# Supplementary material for: Measurement report: Underestimated reactive organic gases from residential combustion – insights from a near-complete speciation
Source: Copernicus journal article supplement (doi:10.5194/acp-23-6633-2023), 2023-06-19
Supplement: Supplementary file 1 [file acp-23-6633-2023-supplement.pdf]

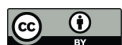

*Supplement of*

## **Measurement report: Underestimated reactive organic gases from residential combustion – insights from a near-complete speciation**

**Yaqin Gao et al.**

*Correspondence to:* Hongli Wang (wanghl@saes.sh.cn) and Cheng Huang (huangc@saes.sh.cn)

The copyright of individual parts of the supplement might differ from the article licence.

### **The representativeness of the cited EF of benzene from the literature**

The EFs in this study were derived from the reported EF of benzene and the emission ratios (ER) of other species to benzene obtained in this study. Thus, to discuss the representative of EFs used for the estimation of emissions, the representativeness of the cited EF of benzene from the literature should be considered firstly as below.

The major studies of the EF of benzene from residential combustion were reviewed and listed in Table S4. It can be seen the EF of benzene from each type of coal combustion generally reached a reasonable level of agreement and values of anthracite / briquette coal combustion ranged from 2 to 14 mg/kg (Cai et al., 2019; Tsai et al., 2003), which were 1-2 magnitude lower than those of bituminous coal combustion (Liu et al., 2017; Liu et al., 2015; Cai et al., 2019; Tsai et al., 2003; Wang et al., 2013). Considering the coal samples tested in this study were anthracite and briquette coal, the present study cited the latest results of anthracite coal combustion from Cai et al. (2019) study, in which the anthracite coal samples were from the two major coal production regions, i.e. Ningxia and Guizhou, and these coal types were widely used in China (Cai et al., 2019; Li et al., 2016b).

In terms of straw combustion, the EF of benzene in 12 samples from 6 literatures in total were summarized in Table S4 (Stockwell et al., 2015; Wu et al., 2022; Hatch et al., 2017; Inomata et al., 2015; Koss et al., 2018; Tsai et al., 2003) and ranged from 73 mg/kg to 800 mg/kg, which had large variations among different studies probably due to the various types of straws and combustion conditions. Among them, 7 out of 12 samples were from China straw, and their EF of benzene generally reached a reasonable level of agreement expect those of wet straw combustion. The present study used the median value of the reported EF of benzene from straw combustion in China, being of 284 mg/kg, which was derived from the simulated real-world combustion in the FLAM-4 laboratory campaign (Stockwell et al., 2015).

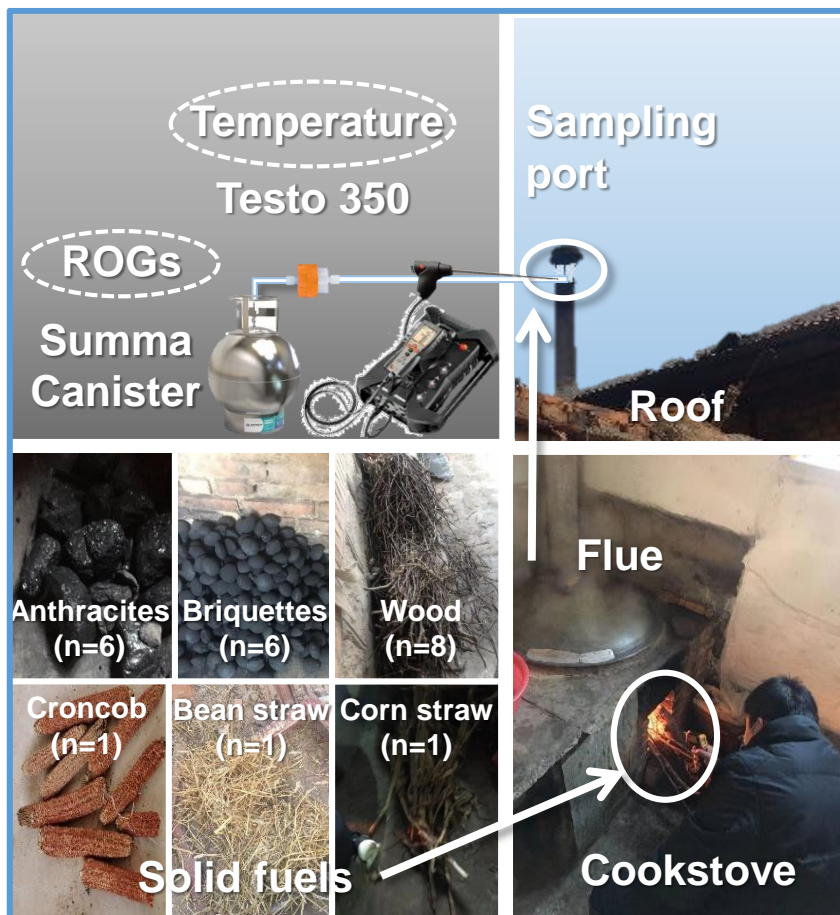

**Figure S1.** Sampling diagram relates to six solid fuels types, household stoves, sampling port and equipment. The letter n refers to the number of different samples.

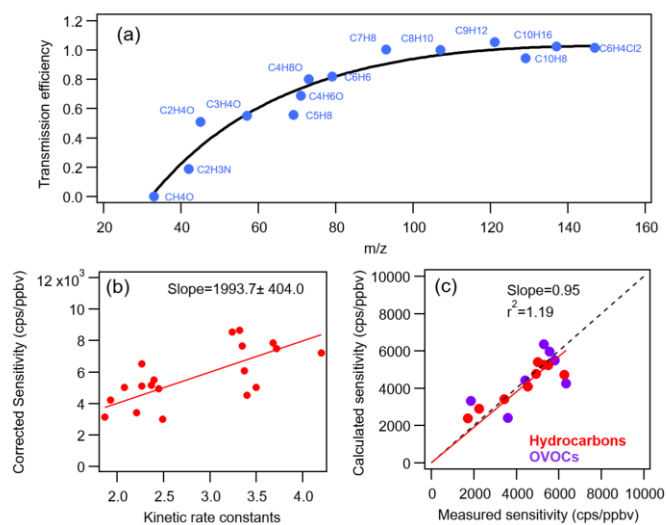

**Figure S2.** (a) The transmission efficiency of the H<sub>3</sub>O<sup>+</sup> PTR-ToF-MS, (b) the relationship between corrected sensitivity and the kinetic rate constants and (c) comparison of calculated and measured calibration factors for standard gases by H<sub>3</sub>O<sup>+</sup> PTR-ToF-MS. The black dash line means 1:1. The corrected sensitivity of a given ROG was derived from the measured sensitivity in panel (c) through the correction of its transmission efficiency in panel (a) and fragment proportion obtained from calibration.

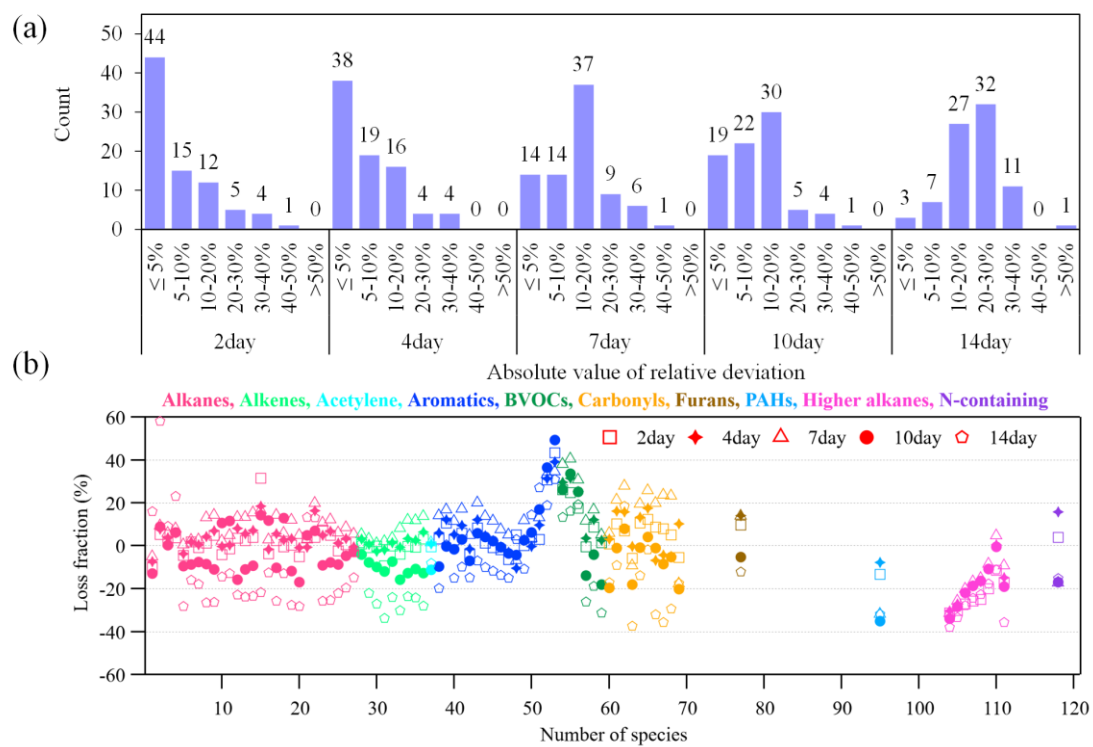

**Figure S3.** Statistical evaluation on the loss fraction of ROGs in the canisters. (a) Species counts in different loss fraction bins on 2, 4, 7, 10, 14 days (x-axis) of storage in the canisters. (b) The loss fraction of each compound standards on 2, 4, 7, 10, 14 days of storage in the canisters. The measured species corresponding to the numbers of horizontal axis are listed in Table S1.

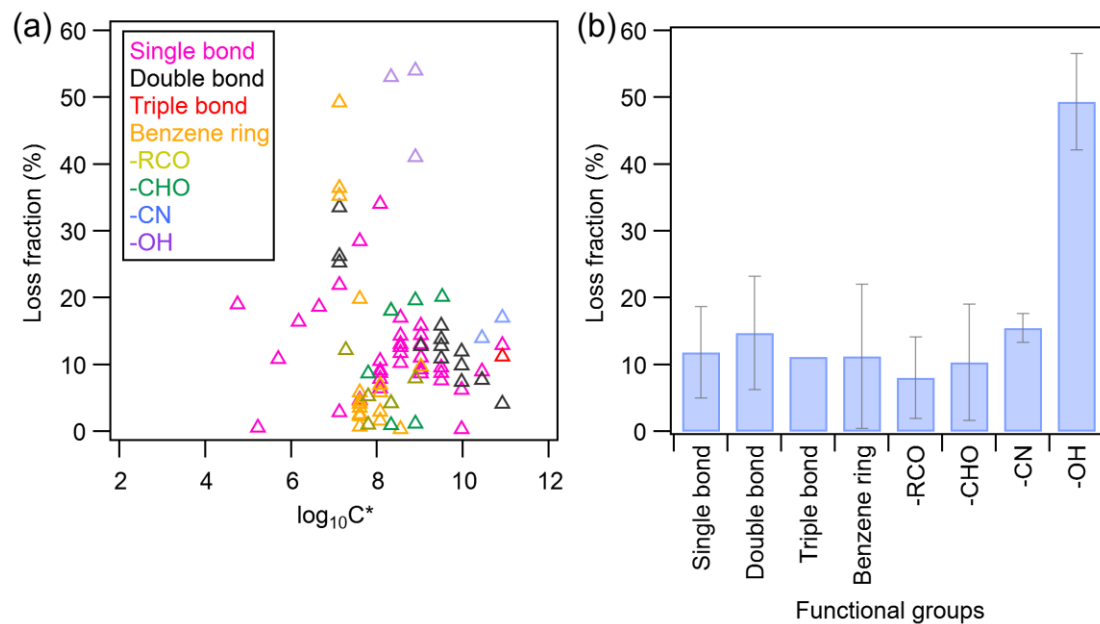

**Figure S4.** Plots of the loss fraction versus volatility (the logarithmic effective saturation vapor concentration,  $\log_{10}C^*$ ) and polarity (functional groups) of species respectively. (a) The scatter plot of the loss fractions of individual species and  $\log_{10}C^*$ , colored by functional groups (see legend). (b) The average and standard deviation of loss fraction for species with the same functional groups.

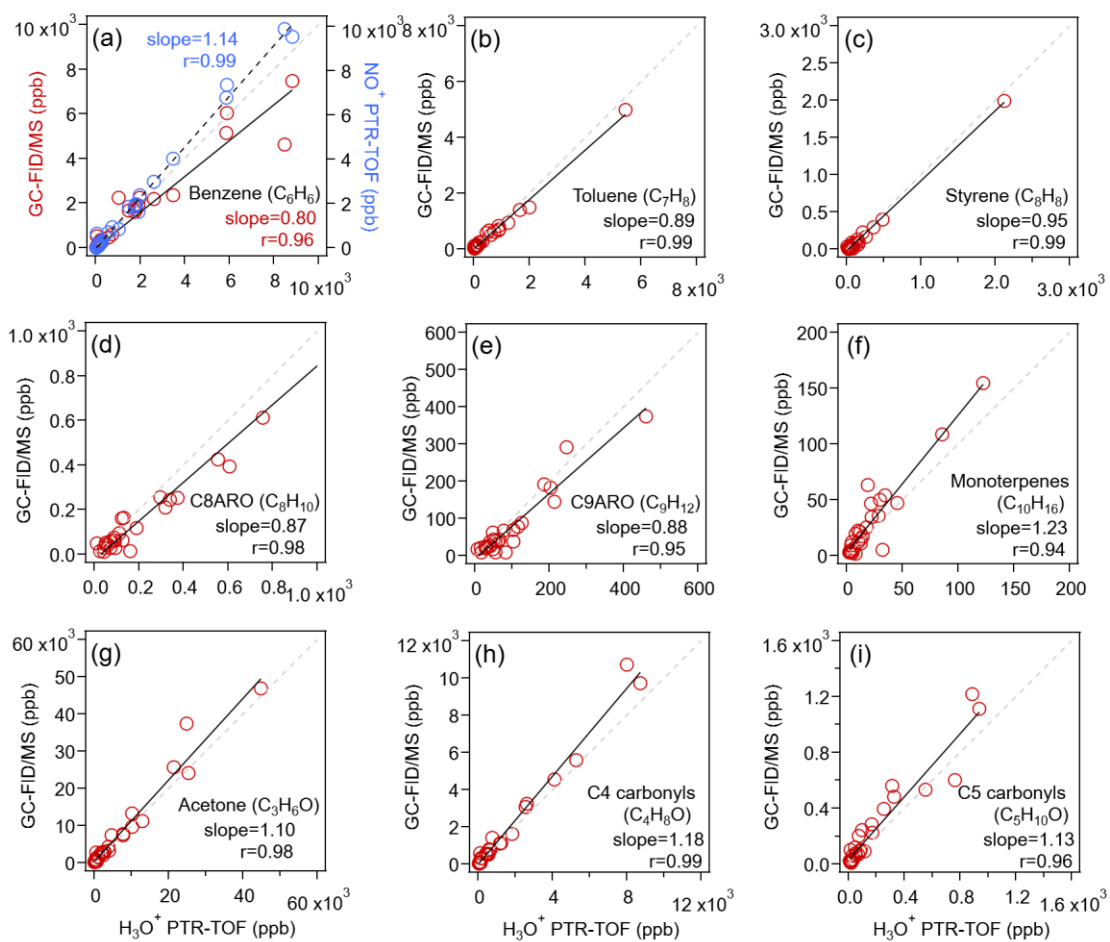

**Figure S5.** Intercomparisons between species measurement of samples by GC-FID/MS and by  $H_3O^+/NO^+$  Vocus PTR-ToF-MS. C8ARO and C9ARO refer to aromatics containing 8 carbon and 9 carbon atoms, respectively.

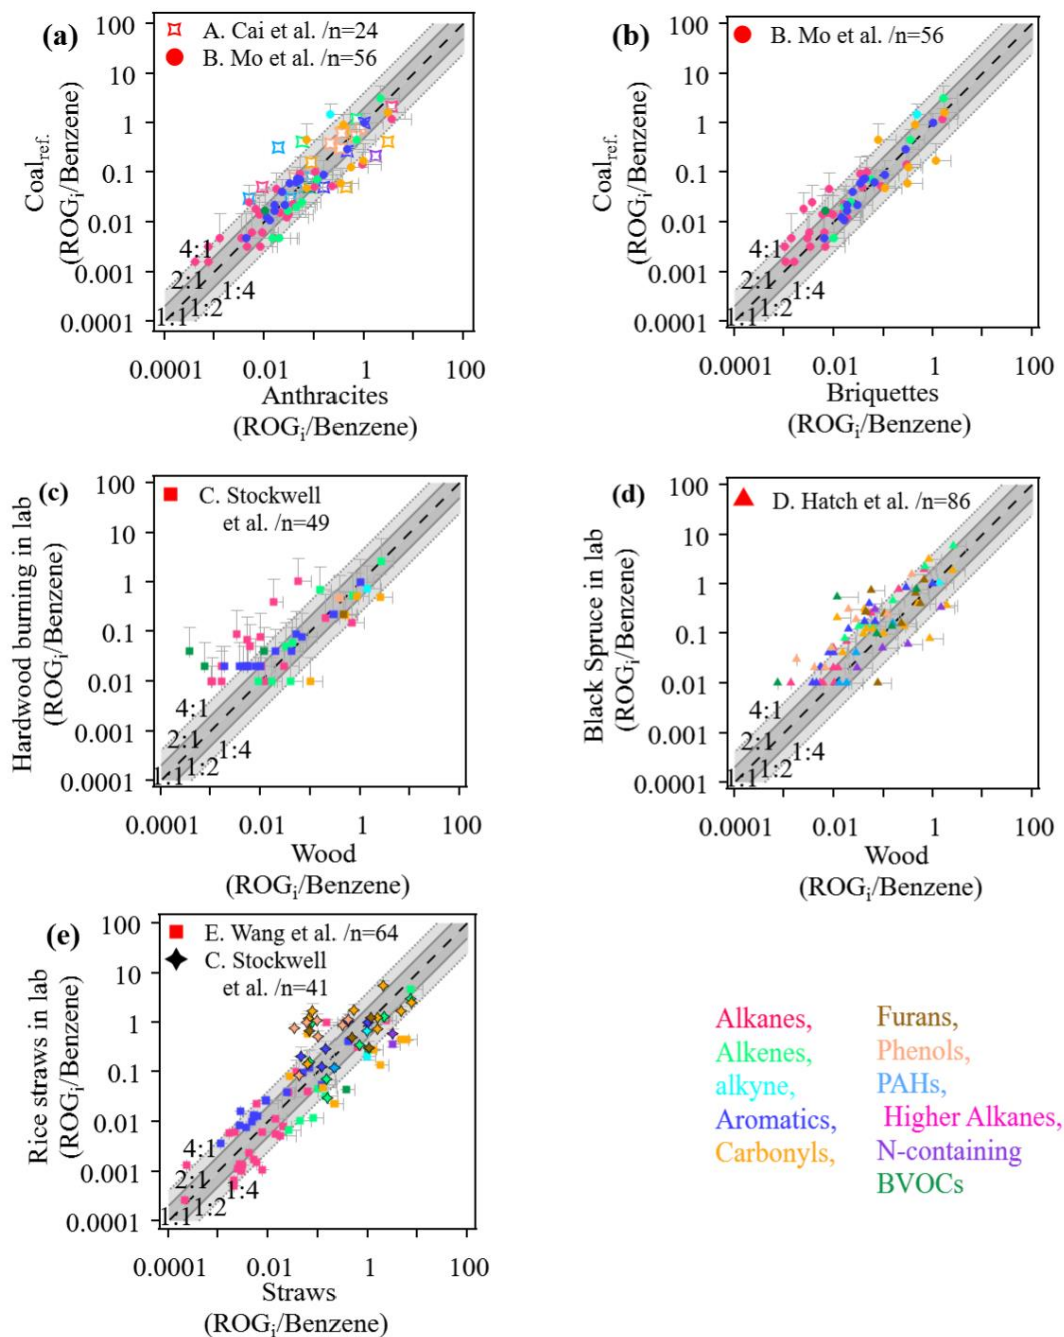

**Figure S6.** Comparison of emission ratios between this study and the previous studies (Hatch et al., 2017; Mo et al., 2016; Stockwell et al., 2015; Wang et al., 2014; Cai et al., 2019; Stockwell et al., 2016). The black dashed lines indicate the 1:1 relationship, and the gray and light gray areas show agreements within a factor of 2 and 4, respectively. n is the number of compared species with the corresponding reference.



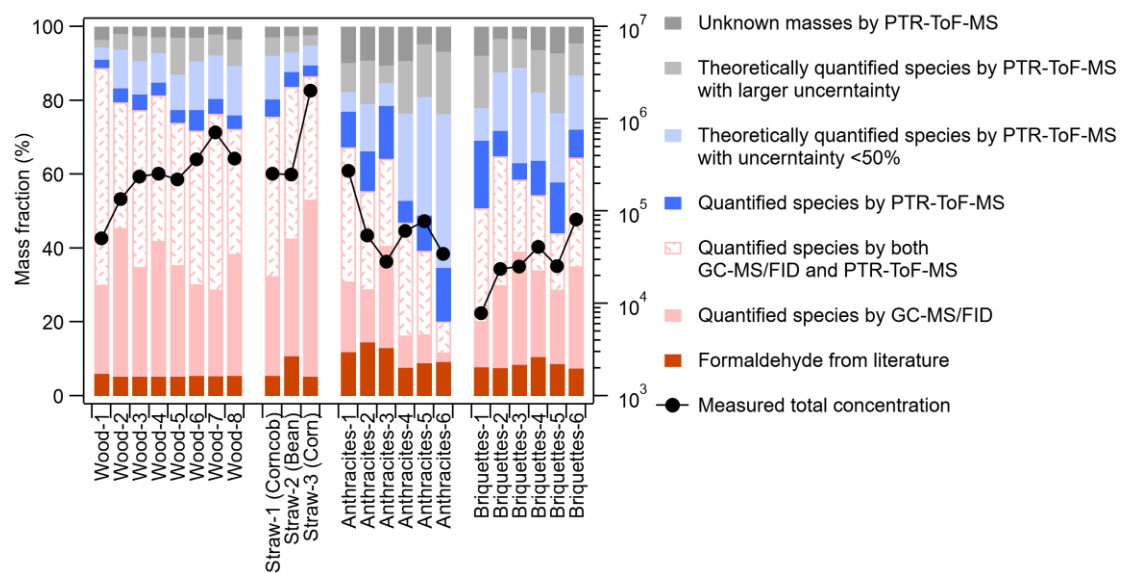

**Figure S7.** Profile composition of species for different samples measured by GC-MS/FID and Vocus PTR-ToF-MS and the measured total ROG concentration of each sample (black line).

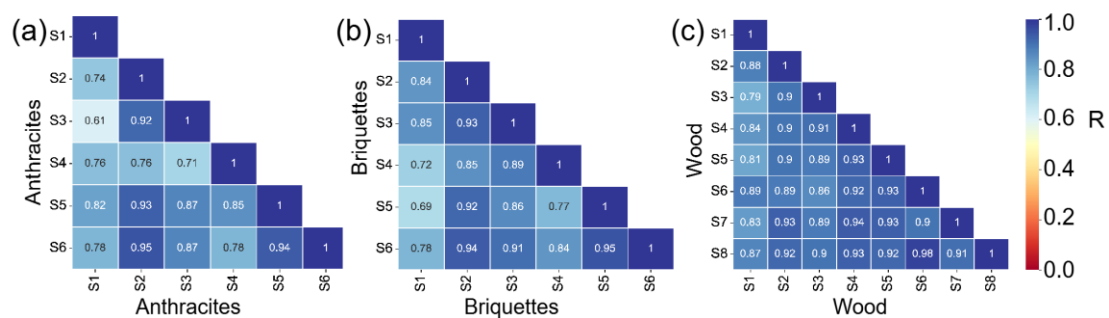

**Figure S8.** Correlation between ROG source profiles of different samples of the same fuel. The number represents the Spearman correlation coefficient (R).

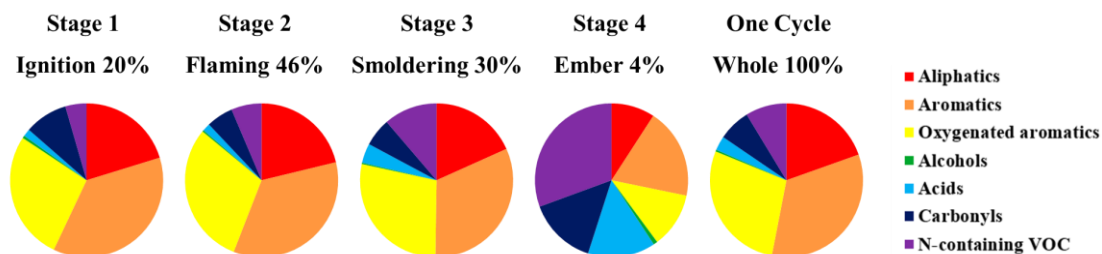

**Figure S9.** Average ROG compositions for residential coal combustion at each stage and the whole cycle adapted from Cai et al. (2019) (The figure was redrawn using the data from the authors).

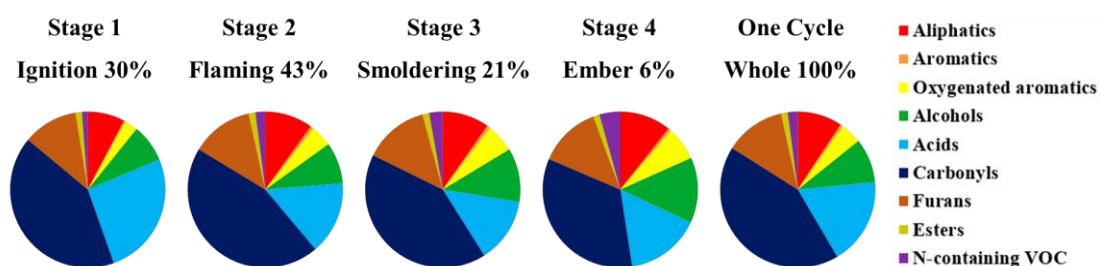

**Figure S10.** Average ROG compositions for straw combustion experiments at each stage and the whole cycle redrawn using data from Koss et al. (2018) (available data from the CSD NOAA archive at <https://esrl.noaa.gov/csd/groups/csd7/measurements/2016firex/FireLab/DataDownload/> (NOAA, 2018)).

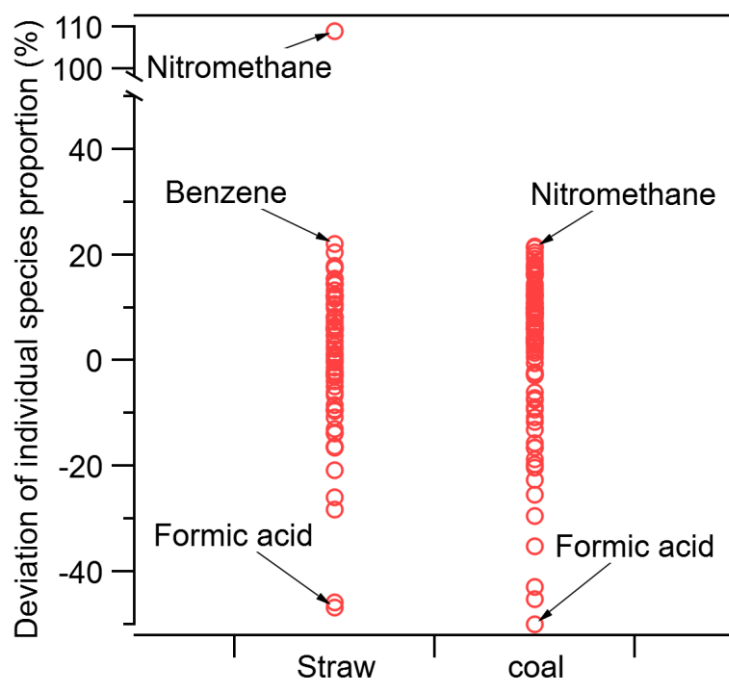

**Figure S11.** The deviation of the proportion of individual species between the flaming stage and the whole cycle. Only the points with the upper and lower limits of deviation and outliers are marked by the species name.

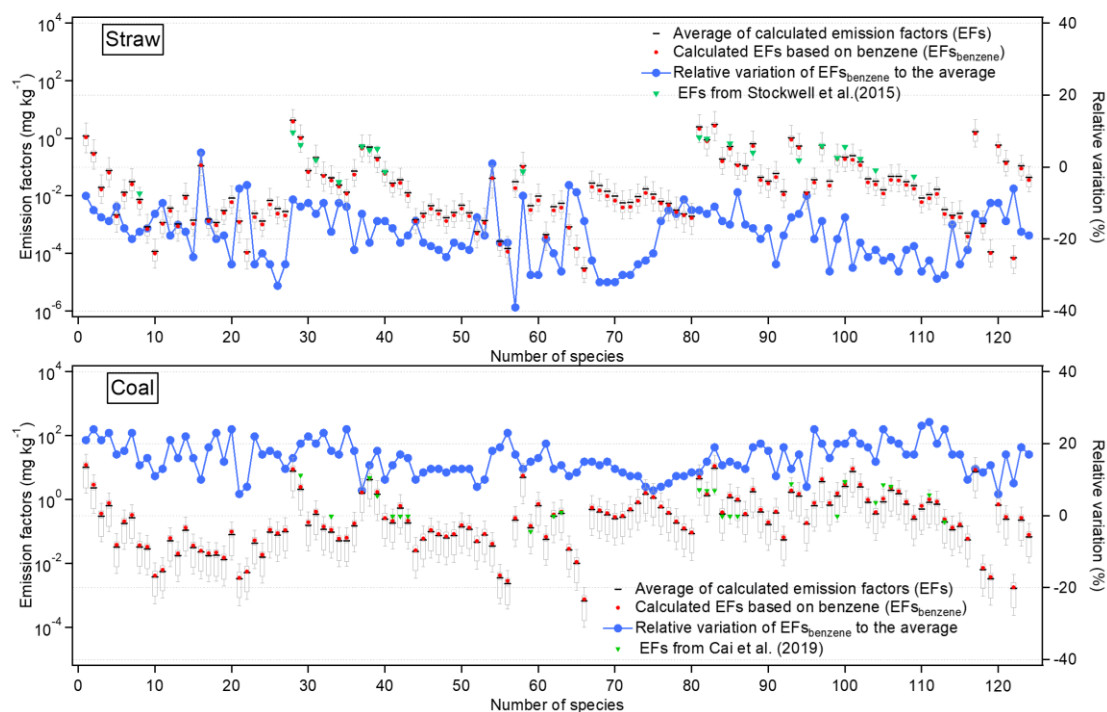

**Figure S12.** Box plot of estimated emission factors (EFs) of newly identified ROGs based on reported EF of ROGs and the relative variation (blue line) of EFs based on benzene to the average of all tests. The red dot is the calculated EFs based on benzene. The box range is the calculated EFs based on other reported species. The green dot is the EFs from references (Cai et al., 2019; Stockwell et al., 2015) used in calculation.

**Table S1.** Review on the measurements of ROG emissions from the residential combustion.

| Method                             | Fuel types                                                                                                  | Reference                   | Numbers of species |                                                      |                                |
|------------------------------------|-------------------------------------------------------------------------------------------------------------|-----------------------------|--------------------|------------------------------------------------------|--------------------------------|
|                                    |                                                                                                             |                             | GC-MS/<br>FID      | PTR-ToF-MS                                           | Other<br>instruments           |
| Combustion<br>in stove             | Residential coals,<br>biomass (straw and<br>wood) from China                                                | This study                  | 71                 | 84 (84-92% of<br>the overall peak<br>mass)           | —                              |
|                                    | Corncob from China                                                                                          | (Wu et al.,<br>2022)        | —                  | 13                                                   | —                              |
|                                    | Anthracite, bituminous<br>coal from China                                                                   | (Cai et al.,<br>2019)       | —                  | 79-89 (90-96%<br>of the overall<br>peak intensities) | —                              |
|                                    | Beech ( <i>Fagus<br/>sylvatica</i> ) logs                                                                   | (Bruns et<br>al., 2017)     | —                  | 64 (94-97% of<br>the total NMOG<br>mass)             | —                              |
|                                    | Biomass (peanut shell,<br>maize straw), raw<br>coals from China                                             | (Wang et<br>al., 2013)      | 60                 | —                                                    | 24 (DNPH-<br>HPLC)             |
| Combustion<br>simulation<br>in Lab | Biomass fuels from the<br>western US                                                                        | (Akherati<br>et al., 2020)  | —                  | 150                                                  | —                              |
|                                    | Burned fuels from the<br>western US                                                                         | (Koss et al.,<br>2018)      | —                  | 172 (~95% of<br>the overall peak<br>intensities)     | 15 (FTIR),<br>261(GC-<br>CIMS) |
|                                    | Four burns: ponderosa<br>pine boughs, Chinese<br>rice straw, Indonesian<br>peat, and black spruce<br>boughs | (Hatch et<br>al., 2017)     | ~27                | ~71                                                  | ~13 (FTIR)<br>~418<br>(GC×GC)  |
|                                    | Authentic globally<br>significant fuels                                                                     | (Stockwell<br>et al., 2015) | —                  | 46-92                                                | —                              |
|                                    | Biomass burns of 18<br>fuel types from 3<br>geographic regions in<br>the US                                 | (Gilman et<br>al., 2015)    | 187                | Unpublished                                          | Unpublished<br>(OP-FTIR)       |
|                                    | Residential coal, rice,<br>maize, and wheat<br>straw from China                                             | (Mo et al.,<br>2016)        | 62                 | —                                                    | 13 (DNPH-<br>HPLC)             |
|                                    | biomass, residential<br>coal from China                                                                     | (Liu et al.,<br>2008)       | 92                 | —                                                    | —                              |

Note:

<sup>a</sup>, DNPH-HPLC: 2, 4-Dinitrophenyl hydrazine followed by high performance liquid chromatography (HPLC).

<sup>b</sup>, FTIR: Fourier transform infrared spectroscopy.

<sup>c</sup>, GC-CIMS: Gas chromatography chemical ionization mass spectrometry.

**Table S2.** Measurement method, loss fraction in canisters, measurement uncertainty and the total uncertainty for individual species in this study.

| Number                        | Formula                         | Name (recommended species for Vocus PTR-ToF-MS) | GC-MS/FID <sup>a</sup> | Vocus PTR-ToF-MS <sup>b</sup> | Uncertainty (%)                                        |          |       |
|-------------------------------|---------------------------------|-------------------------------------------------|------------------------|-------------------------------|--------------------------------------------------------|----------|-------|
|                               |                                 |                                                 |                        |                               | Storage loss on day 10th <sup>d</sup> (avg. $\pm$ sd.) | Analysis | Total |
| <b>Alkanes (27)</b>           |                                 |                                                 |                        |                               |                                                        |          |       |
| 1                             | C <sub>2</sub> H <sub>6</sub>   | Ethane                                          | Yes                    | No                            | -12.9 $\pm$ 3.4                                        | 4        | 14    |
| 2                             | C <sub>3</sub> H <sub>8</sub>   | Propane                                         | Yes                    | No                            | 8.9 $\pm$ 13.8                                         | 5        | 10    |
| 3                             | C <sub>4</sub> H <sub>10</sub>  | Isobutane                                       | Yes                    | No                            | 0.3 $\pm$ 3.8                                          | 4        | 4     |
| 4                             | C <sub>4</sub> H <sub>10</sub>  | n-Butane                                        | Yes                    | No                            | 6.2 $\pm$ 10.3                                         | 4        | 8     |
| 5                             | C <sub>5</sub> H <sub>10</sub>  | Cyclopentane                                    | Yes                    | No                            | -9.5 $\pm$ 7.3                                         | 3        | 10    |
| 6                             | C <sub>5</sub> H <sub>12</sub>  | Isopentane                                      | Yes                    | No                            | -8.7 $\pm$ 6.7                                         | 3        | 9     |
| 7                             | C <sub>5</sub> H <sub>12</sub>  | n-Pentane                                       | Yes                    | No                            | -7.6 $\pm$ 5.4                                         | 3        | 8     |
| 8                             | C <sub>6</sub> H <sub>12</sub>  | Methylcyclopentane                              | Yes                    | No                            | -8.6 $\pm$ 10.9                                        | 6        | 10    |
| 9                             | C <sub>6</sub> H <sub>12</sub>  | Cyclohexane                                     | Yes                    | No                            | -11.0 $\pm$ 11.3                                       | 4        | 12    |
| 10                            | C <sub>6</sub> H <sub>14</sub>  | 2,2-Dimethylbutane                              | Yes                    | No                            | -14.4 $\pm$ 8.2                                        | 3        | 15    |
| 11                            | C <sub>6</sub> H <sub>14</sub>  | 2,3-Dimethylbutane                              | Yes                    | No                            | -13.0 $\pm$ 9.6                                        | 10       | 16    |
| 12                            | C <sub>6</sub> H <sub>14</sub>  | 2-Methylpentane                                 | Yes                    | No                            | -15.8 $\pm$ 8.1                                        | 3        | 16    |
| 13                            | C <sub>6</sub> H <sub>14</sub>  | 3-Methylpentane                                 | Yes                    | No                            | -11.0 $\pm$ 10.2                                       | 3        | 11    |
| 14                            | C <sub>6</sub> H <sub>14</sub>  | n-Hexane                                        | Yes                    | No                            | -9.2 $\pm$ 10.2                                        | 4        | 10    |
| 15                            | C <sub>7</sub> H <sub>14</sub>  | Methylcyclohexane                               | Yes                    | No                            | 14.3 $\pm$ 14.8                                        | 3        | 15    |
| 16                            | C <sub>7</sub> H <sub>16</sub>  | 2,4-Dimethylpentane                             | Yes                    | No                            | -12.6 $\pm$ 10.9                                       | 7        | 14    |
| 17                            | C <sub>7</sub> H <sub>16</sub>  | 2-Methylhexane                                  | Yes                    | No                            | -10.2 $\pm$ 11.5                                       | 7        | 12    |
| 18                            | C <sub>7</sub> H <sub>16</sub>  | 2,3-Dimethylpentane                             | Yes                    | No                            | -13.0 $\pm$ 11.5                                       | 3        | 13    |
| 19                            | C <sub>7</sub> H <sub>16</sub>  | 3-Methylhexane                                  | Yes                    | No                            | -11.7 $\pm$ 11.8                                       | 7        | 14    |
| 20                            | C <sub>7</sub> H <sub>16</sub>  | n-Heptane                                       | Yes                    | No                            | -17.0 $\pm$ 9.6                                        | 12       | 21    |
| 21                            | C <sub>8</sub> H <sub>18</sub>  | 2,2,4-Trimethylpentane                          | Yes                    | No                            | -10.5 $\pm$ 12.0                                       | 4        | 11    |
| 22                            | C <sub>8</sub> H <sub>18</sub>  | 2,3,4-Trimethylpentane                          | Yes                    | No                            | -6.4 $\pm$ 12.1                                        | 12       | 13    |
| 23                            | C <sub>8</sub> H <sub>18</sub>  | 2-Methylheptane                                 | Yes                    | No                            | -9.1 $\pm$ 11.9                                        | 12       | 15    |
| 24                            | C <sub>8</sub> H <sub>18</sub>  | 3-Methylheptane                                 | Yes                    | No                            | -7.8 $\pm$ 12.2                                        | 13       | 15    |
| 25                            | C <sub>8</sub> H <sub>18</sub>  | n-Octane                                        | Yes                    | No                            | -8.7 $\pm$ 11.3                                        | 18       | 20    |
| 26                            | C <sub>9</sub> H <sub>20</sub>  | n-Nonane                                        | Yes                    | No                            | -4.7 $\pm$ 12.1                                        | 15       | 15    |
| 27                            | C <sub>10</sub> H <sub>22</sub> | n-Decane                                        | Yes                    | No                            | -2.8 $\pm$ 12.1                                        | 20       | 20    |
| <b>Alkenes (9)/Alkyne (1)</b> |                                 |                                                 |                        |                               |                                                        |          |       |
| 28                            | C <sub>2</sub> H <sub>4</sub>   | Ethylene                                        | Yes                    | No                            | -4.1 $\pm$ 6.7                                         | 5        | 7     |
| 29                            | C <sub>3</sub> H <sub>6</sub>   | Propylene                                       | Yes                    | No                            | -7.7 $\pm$ 8.2                                         | 6        | 10    |
| 30                            | C <sub>4</sub> H <sub>8</sub>   | Trans-2-butene                                  | Yes                    | No                            | -9.8 $\pm$ 7.7                                         | 3        | 10    |
| 31                            | C <sub>4</sub> H <sub>8</sub>   | 1-Butene                                        | Yes                    | No                            | -11.9 $\pm$ 13.4                                       | 3        | 12    |
| 32                            | C <sub>4</sub> H <sub>8</sub>   | Cis-2-butene                                    | Yes                    | No                            | -7.4 $\pm$ 7.4                                         | 3        | 8     |
| 33                            | C <sub>5</sub> H <sub>10</sub>  | 1-Pentene                                       | Yes                    | No                            | -15.8 $\pm$ 9.6                                        | 3        | 16    |
| 34                            | C <sub>5</sub> H <sub>10</sub>  | Trans-2-pentene                                 | Yes                    | No                            | -12.7 $\pm$ 9.3                                        | 3        | 13    |
| 35                            | C <sub>5</sub> H <sub>10</sub>  | Cis-2-pentene                                   | Yes                    | No                            | -10.9 $\pm$ 13.0                                       | 3        | 11    |
| 36                            | C <sub>6</sub> H <sub>12</sub>  | 1-Hexene                                        | Yes                    | No                            | -12.7 $\pm$ 9.7                                        | 5        | 14    |
| 37                            | C <sub>2</sub> H <sub>2</sub>   | Acetylene                                       | Yes                    | No                            | -11.2 $\pm$ 6.5                                        | 5        | 12    |
| <b>Aromatics (16)</b>         |                                 |                                                 |                        |                               |                                                        |          |       |
| 38                            | C <sub>6</sub> H <sub>6</sub>   | Benzene*                                        | Yes                    | Yes                           | -9.7 $\pm$ 11.8                                        | 5        | 11    |
| 39                            | C <sub>7</sub> H <sub>8</sub>   | Toluene*                                        | Yes                    | Yes                           | -0.3 $\pm$ 10.9                                        | 1        | 1     |
| 40                            | C <sub>8</sub> H <sub>8</sub>   | Styrene*                                        | Yes                    | Yes                           | -1.6 $\pm$ 12.3                                        | 6        | 6     |
| 41                            | C <sub>8</sub> H <sub>10</sub>  | Ethylbenzene                                    | Yes                    | Yes                           | 2.9 $\pm$ 12.7                                         | 9        | 9     |
| 42                            | C <sub>8</sub> H <sub>10</sub>  | m/p-Xylene*                                     | Yes                    | Yes                           | -6.9 $\pm$ 11.2                                        | 14       | 16    |
| 43                            | C <sub>8</sub> H <sub>10</sub>  | o-Xylene                                        | Yes                    | Yes                           | 5.8 $\pm$ 13.6                                         | 9        | 11    |
| 44                            | C <sub>9</sub> H <sub>12</sub>  | iso-Propylbenzene                               | Yes                    | Yes                           | 4.1 $\pm$ 13.5                                         | 4        | 6     |
| 45                            | C <sub>9</sub> H <sub>12</sub>  | n-Propylbenzene                                 | Yes                    | Yes                           | 2.2 $\pm$ 13.2                                         | 7        | 7     |
| 46                            | C <sub>9</sub> H <sub>12</sub>  | m-Ethyltoluene                                  | Yes                    | Yes                           | -0.7 $\pm$ 12.8                                        | 4        | 4     |

|                       |                                               |                                            |     |     |                    |    |    |
|-----------------------|-----------------------------------------------|--------------------------------------------|-----|-----|--------------------|----|----|
| 47                    | C <sub>9</sub> H <sub>12</sub>                | p-Ethyltoluene                             | Yes | Yes | -3.5 ± 12.3        | 6  | 7  |
| 48                    | C <sub>9</sub> H <sub>12</sub>                | 1,3,5-Trimethylbenzene*                    | Yes | Yes | -4.5 ± 12.0        | 14 | 15 |
| 49                    | C <sub>9</sub> H <sub>12</sub>                | o-Ethyltoluene                             | Yes | Yes | 2.5 ± 13.2         | 6  | 7  |
| 50                    | C <sub>9</sub> H <sub>12</sub>                | 1,2,4-Trimethylbenzene                     | Yes | Yes | 5.8 ± 13.6         | 8  | 10 |
| 51                    | C <sub>9</sub> H <sub>12</sub>                | 1,2,3-Trimethylbenzene                     | Yes | Yes | 19.8 ± 12.4        | 8  | 21 |
| 52                    | C <sub>10</sub> H <sub>14</sub>               | m-Diethylbenzene                           | Yes | Yes | 36.4 ± 16.1        | 3  | 37 |
| 53                    | C <sub>10</sub> H <sub>14</sub>               | p-Diethylbenzene                           | Yes | Yes | 49.2 ± 17.0        | 8  | 50 |
| <b>BVOCs (6)</b>      |                                               |                                            |     |     |                    |    |    |
| 54                    | C <sub>5</sub> H <sub>8</sub>                 | Isoprene*                                  | Yes | Yes | -13.8 ± 11.1       | 8  | 16 |
| 55                    | C <sub>10</sub> H <sub>16</sub>               | alpha-Pinene*                              | Yes | Yes | 26.2 ± 8.2         | 11 | 28 |
| 56                    | C <sub>10</sub> H <sub>16</sub>               | beta-Pinene                                | Yes | Yes | 33.5 ± 0.2         | 11 | 35 |
| 57                    | C <sub>10</sub> H <sub>16</sub>               | Cinene (Limonene)                          | Yes | Yes | 25.2 ± 2.6         | 16 | 30 |
| 58                    | C <sub>4</sub> H <sub>6</sub> O               | Methacrolein                               | Yes | Yes | -4.2 ± 2.6         | 12 | 13 |
| 59                    | C <sub>4</sub> H <sub>6</sub> O               | Methyl vinyl ketone*                       | Yes | Yes | -18.0 ± 14.6       | 7  | 19 |
| <b>Carbonyls (16)</b> |                                               |                                            |     |     |                    |    |    |
| 60                    | C <sub>3</sub> H <sub>4</sub> O               | Acrolein*                                  | Yes | Yes | -19.6 ± 5.1        | 4  | 20 |
| 61                    | C <sub>3</sub> H <sub>6</sub> O               | Propanal                                   | Yes | Yes | -1.1 ± 6.0         | 4  | 4  |
| 62                    | C <sub>3</sub> H <sub>6</sub> O               | Acetone*                                   | Yes | Yes | 7.9 ± 7.2          | 3  | 9  |
| 63                    | C <sub>4</sub> H <sub>6</sub> O               | Crotonaldehyde                             | Yes | Yes | -18.0 ± 4.0        | 16 | 24 |
| 64                    | C <sub>4</sub> H <sub>8</sub> O               | n-Butanal                                  | Yes | Yes | -0.9 ± 2.5         | 5  | 5  |
| 65                    | C <sub>4</sub> H <sub>8</sub> O               | Methyl ethyl ketone*                       | Yes | Yes | 4.2 ± 1.6          | 3  | 5  |
| 66                    | C <sub>5</sub> H <sub>10</sub> O              | 2-Pentanone*                               | Yes | Yes | -1.0 ± 2.3         | 19 | 19 |
| 67                    | C <sub>5</sub> H <sub>10</sub> O              | n-Pentanal                                 | Yes | Yes | -8.6 ± 4.0         | 5  | 10 |
| 68                    | C <sub>5</sub> H <sub>10</sub> O              | 3-Pentanone                                | Yes | Yes | -5.2 ± 3.6         | 2  | 6  |
| 69                    | C <sub>2</sub> H <sub>4</sub> O               | Acetaldehyde*                              | Yes | Yes | -20.1 ± 11.9       | 5  | 21 |
| 70                    | CH <sub>2</sub> O                             | Formaldehyde <sup>c</sup>                  | —   | —   | —                  | —  | —  |
| 71                    | C <sub>3</sub> H <sub>4</sub> O <sub>2</sub>  | Methylglyoxal                              | No  | Yes | -20.1 <sup>e</sup> | 27 | 34 |
| 72                    | C <sub>5</sub> H <sub>4</sub> O               | Cyclopentadienone                          | No  | Yes | -20.1 <sup>e</sup> | 21 | 29 |
| 73                    | C <sub>5</sub> H <sub>8</sub> O               | EVK, cyclopentanone,<br>Dihydromethylfuran | No  | Yes | -20.1 <sup>e</sup> | 21 | 29 |
| 74                    | C <sub>6</sub> H <sub>12</sub> O              | C6 carbonyls*                              | No  | Yes | -12.1 ± 5.8        | 11 | 16 |
| 75                    | C <sub>7</sub> H <sub>6</sub> O               | Benzaldehyde                               | No  | Yes | -20.1 <sup>e</sup> | 21 | 29 |
| <b>Furans (10)</b>    |                                               |                                            |     |     |                    |    |    |
| 76                    | C <sub>4</sub> H <sub>4</sub> O               | Furan*                                     | No  | Yes | -5.3 ± 2.2         | 10 | 11 |
| 77                    | C <sub>5</sub> H <sub>6</sub> O               | Methylfuran                                | No  | Yes | -5.3 <sup>e</sup>  | 25 | 26 |
| 78                    | C <sub>4</sub> H <sub>4</sub> O <sub>2</sub>  | Furanone                                   | No  | Yes | -5.3 <sup>e</sup>  | 27 | 27 |
| 79                    | C <sub>5</sub> H <sub>4</sub> O <sub>2</sub>  | Furfural                                   | No  | Yes | -5.3 <sup>e</sup>  | 27 | 27 |
| 80                    | C <sub>6</sub> H <sub>8</sub> O               | Dimethylfuran                              | No  | Yes | -5.3 <sup>e</sup>  | 25 | 26 |
| 81                    | C <sub>5</sub> H <sub>6</sub> O <sub>2</sub>  | 2-Methanol furanone                        | No  | Yes | -5.3 <sup>e</sup>  | 27 | 27 |
| 82                    | C <sub>7</sub> H <sub>10</sub> O              | Trimethylfuran                             | No  | Yes | -5.3 <sup>e</sup>  | 25 | 26 |
| 83                    | C <sub>6</sub> H <sub>8</sub> O <sub>2</sub>  | Dimethylfuranone                           | No  | Yes | -5.3 <sup>e</sup>  | 27 | 27 |
| 84                    | C <sub>8</sub> H <sub>6</sub> O               | Benzofuran                                 | No  | Yes | -5.3 <sup>e</sup>  | 25 | 26 |
| 85                    | C <sub>8</sub> H <sub>12</sub> O              | Butylfuran                                 | No  | Yes | -5.3 <sup>e</sup>  | 25 | 26 |
| <b>Phenols (9)</b>    |                                               |                                            |     |     |                    |    |    |
| 86                    | C <sub>6</sub> H <sub>6</sub> O               | Phenol                                     | No  | Yes | -20.1 <sup>e</sup> | 22 | 30 |
| 87                    | C <sub>7</sub> H <sub>8</sub> O               | Cresol                                     | No  | Yes | -20.1 <sup>e</sup> | 22 | 30 |
| 88                    | C <sub>6</sub> H <sub>6</sub> O <sub>2</sub>  | Benzenediols;<br>Methylfurfural            | No  | Yes | -20.1 <sup>e</sup> | 27 | 34 |
| 89                    | C <sub>8</sub> H <sub>10</sub> O              | C2 phenols                                 | No  | Yes | -20.1 <sup>e</sup> | 22 | 30 |
| 90                    | C <sub>7</sub> H <sub>8</sub> O <sub>2</sub>  | Guaiacol                                   | No  | Yes | -20.1 <sup>e</sup> | 27 | 34 |
| 91                    | C <sub>9</sub> H <sub>12</sub> O              | Trimethylphenol                            | No  | Yes | -20.1 <sup>e</sup> | 22 | 30 |
| 92                    | C <sub>10</sub> H <sub>8</sub> O              | Naphthalenol                               | No  | Yes | -20.1 <sup>e</sup> | 22 | 30 |
| 93                    | C <sub>10</sub> H <sub>12</sub> O             | methyl chavicol                            | No  | Yes | -20.1 <sup>e</sup> | 22 | 30 |
| 94                    | C <sub>8</sub> H <sub>10</sub> O <sub>3</sub> | Syringol                                   | No  | Yes | -20.1 <sup>e</sup> | 39 | 44 |
| <b>PAHs (9)</b>       |                                               |                                            |     |     |                    |    |    |
| 95                    | C <sub>10</sub> H <sub>8</sub>                | Naphthalene*                               | No  | Yes | -35.2 ± 7.4        | 11 | 37 |
| 96                    | C <sub>10</sub> H <sub>10</sub>               | Dihydronaphthalene                         | No  | Yes | -35.2 <sup>e</sup> | 21 | 41 |



|                            |                                 |                                   |    |     |                    |    |    |
|----------------------------|---------------------------------|-----------------------------------|----|-----|--------------------|----|----|
| 97                         | C <sub>11</sub> H <sub>10</sub> | Methylnaphthalene                 | No | Yes | -35.2 <sup>e</sup> | 21 | 41 |
| 98                         | C <sub>12</sub> H <sub>8</sub>  | Acenaphthylene                    | No | Yes | -35.2 <sup>e</sup> | 21 | 41 |
| 99                         | C <sub>12</sub> H <sub>10</sub> | Acenaphthene                      | No | Yes | -35.2 <sup>e</sup> | 21 | 41 |
| 100                        | C <sub>12</sub> H <sub>12</sub> | Dimethylnaphthalene               | No | Yes | -35.2 <sup>e</sup> | 21 | 41 |
| 101                        | C <sub>13</sub> H <sub>10</sub> | Fluorene                          | No | Yes | -35.2 <sup>e</sup> | 21 | 41 |
| 102                        | C <sub>14</sub> H <sub>10</sub> | Phenanthrene, Anthracene          | No | Yes | -35.2 <sup>e</sup> | 23 | 42 |
| 103                        | C <sub>16</sub> H <sub>10</sub> | Pyrene, Fluoranthene              | No | Yes | -35.2 <sup>e</sup> | 23 | 42 |
| <b>Higher alkanes (14)</b> |                                 |                                   |    |     |                    |    |    |
| 104                        | C <sub>8</sub> H <sub>18</sub>  | C8 Alkanes*                       | No | Yes | -34.0 ± 3.2        | 18 | 39 |
| 105                        | C <sub>9</sub> H <sub>20</sub>  | C9 Alkanes*                       | No | Yes | -28.4 ± 1.3        | 12 | 31 |
| 106                        | C <sub>10</sub> H <sub>22</sub> | C10 Alkanes*                      | No | Yes | -21.9 ± 1.4        | 12 | 25 |
| 107                        | C <sub>11</sub> H <sub>24</sub> | C11 Alkanes*                      | No | Yes | -18.6 ± 1.3        | 14 | 23 |
| 108                        | C <sub>12</sub> H <sub>26</sub> | C12 Alkanes*                      | No | Yes | -16.4 ± 3.4        | 15 | 22 |
| 109                        | C <sub>13</sub> H <sub>28</sub> | C13 Alkanes*                      | No | Yes | -10.8 ± 15.9       | 19 | 22 |
| 110                        | C <sub>14</sub> H <sub>30</sub> | C14 Alkanes*                      | No | Yes | -0.5 ± 30.8        | 17 | 17 |
| 111                        | C <sub>15</sub> H <sub>32</sub> | C15 Alkanes*                      | No | Yes | -19.0 ± 26.7       | 12 | 23 |
| 112                        | C <sub>16</sub> H <sub>34</sub> | C16 Alkanes                       | No | Yes | -34.0 <sup>e</sup> | 27 | 44 |
| 113                        | C <sub>17</sub> H <sub>36</sub> | C17 Alkanes                       | No | Yes | -34.0 <sup>e</sup> | 27 | 44 |
| 114                        | C <sub>18</sub> H <sub>38</sub> | C18 Alkanes                       | No | Yes | -34.0 <sup>e</sup> | 27 | 44 |
| 115                        | C <sub>19</sub> H <sub>40</sub> | C19 Alkanes                       | No | Yes | -34.0 <sup>e</sup> | 27 | 44 |
| 116                        | C <sub>20</sub> H <sub>42</sub> | C20 Alkanes                       | No | Yes | -34.0 <sup>e</sup> | 27 | 44 |
| 117                        | C <sub>21</sub> H <sub>44</sub> | C21 Alkanes                       | No | Yes | -34.0 <sup>e</sup> | 27 | 44 |
| <b>N-containing (8)</b>    |                                 |                                   |    |     |                    |    |    |
| 118                        | C <sub>2</sub> H <sub>3</sub> N | Acetonitrile*                     | No | Yes | -17.0 ± 10.5       | 15 | 23 |
| 119                        | C <sub>2</sub> H <sub>5</sub> N | Ethenamine                        | No | Yes | -17.0 <sup>e</sup> | 23 | 29 |
| 120                        | C <sub>2</sub> H <sub>7</sub> N | Dimethylamine, ethylamine         | No | Yes | -17.0 <sup>e</sup> | 23 | 29 |
| 121                        | C <sub>3</sub> H <sub>3</sub> N | Acrylonitrile*                    | No | Yes | -13.9 ± 1.4        | 8  | 16 |
| 122                        | C <sub>3</sub> H <sub>5</sub> N | Propanenitrile                    | No | Yes | -17.0 <sup>e</sup> | 22 | 28 |
| 123                        | C <sub>3</sub> H <sub>9</sub> N | C3 amines                         | No | Yes | -17.0 <sup>e</sup> | 23 | 29 |
| 124                        | C <sub>4</sub> H <sub>5</sub> N | Pyrrrole; Butenenitriles          | No | Yes | -17.0 <sup>e</sup> | 22 | 28 |
| 125                        | C <sub>4</sub> H <sub>7</sub> N | Dihydropyrrole;<br>Butanenitriles | No | Yes | -17.0 <sup>e</sup> | 22 | 28 |

<sup>a</sup>, The data measured by GC-FID/MS was used in this work for the overlapped ROG species measured by two instruments.

<sup>b</sup>, The species with star mark was the standard gas for Vocus PTR-ToF-MS calibration.

<sup>c</sup>, Formaldehyde discussed in this study was estimated from previous studies (Cai et al., 2019; Stockwell et al., 2015).

<sup>d</sup>, In total, loss fraction of 82 species were determined.

<sup>e</sup>, The loss fraction of species was an assumed value as the maximum loss ratio of the same category. The loss ratio of phenol was assumed as the maximum value of all OVOCs in the 125 species.

**Table S3.** Applied SOA yields, chamber SOA yields, references and the numbers of experiments (N).

| No. | Formula                         | Species                | Applied Yield (g/g) | Reference                                        | Chamber Yield (g/g) | N  |
|-----|---------------------------------|------------------------|---------------------|--------------------------------------------------|---------------------|----|
| 1   | C <sub>2</sub> H <sub>6</sub>   | Ethane                 | /                   |                                                  |                     |    |
| 2   | C <sub>3</sub> H <sub>8</sub>   | Propane                | /                   |                                                  |                     |    |
| 3   | C <sub>4</sub> H <sub>10</sub>  | Isobutane              | /                   |                                                  |                     |    |
| 4   | C <sub>4</sub> H <sub>10</sub>  | n-Butane               | /                   |                                                  |                     |    |
| 5   | C <sub>5</sub> H <sub>10</sub>  | Cyclopentane           | /                   |                                                  |                     |    |
| 6   | C <sub>5</sub> H <sub>12</sub>  | Isopentane             | /                   |                                                  |                     |    |
| 7   | C <sub>5</sub> H <sub>12</sub>  | n-Pentane              | /                   |                                                  |                     |    |
| 8   | C <sub>6</sub> H <sub>12</sub>  | Methylcyclopentane     | 0.017               | Assumed as Cyclohexane                           |                     |    |
| 9   | C <sub>6</sub> H <sub>12</sub>  | Cyclohexane            | 0.017               | (Lim and Ziemann, 2009)                          | 0.040               | 1  |
| 10  | C <sub>6</sub> H <sub>14</sub>  | 2,2-Dimethylbutane     | /                   |                                                  |                     |    |
| 11  | C <sub>6</sub> H <sub>14</sub>  | 2,3-Dimethylbutane     | /                   |                                                  |                     |    |
| 12  | C <sub>6</sub> H <sub>14</sub>  | 2-Methylpentane        | /                   |                                                  |                     |    |
| 13  | C <sub>6</sub> H <sub>14</sub>  | 3-Methylpentane        | /                   |                                                  |                     |    |
| 14  | C <sub>6</sub> H <sub>14</sub>  | n-Hexane               | 0.000               | (Lim and Ziemann, 2009)                          | 0.000               | 1  |
| 15  | C <sub>7</sub> H <sub>14</sub>  | Methylcyclohexane      | 0.017               | Assumed as Cyclohexane                           |                     |    |
| 16  | C <sub>7</sub> H <sub>16</sub>  | 2,4-Dimethylpentane    | 0.010               | Assumed as n-Heptane                             |                     |    |
| 17  | C <sub>7</sub> H <sub>16</sub>  | 2-Methylhexane         | 0.010               | Assumed as n-Heptane                             |                     |    |
| 18  | C <sub>7</sub> H <sub>16</sub>  | 2,3-Dimethylpentane    | 0.010               | Assumed as n-Heptane                             |                     |    |
| 19  | C <sub>7</sub> H <sub>16</sub>  | 3-Methylhexane         | 0.010               | Assumed as n-Heptane                             |                     |    |
| 20  | C <sub>7</sub> H <sub>16</sub>  | n-Heptane              | 0.010               | (Lim and Ziemann, 2009)                          | 0.009               | 1  |
| 21  | C <sub>8</sub> H <sub>18</sub>  | 2,2,4-Trimethylpentane | 0.017               | Assumed as n-Octane                              |                     |    |
| 22  | C <sub>8</sub> H <sub>18</sub>  | 2,3,4-Trimethylpentane | 0.017               | Assumed as n-Octane                              |                     |    |
| 23  | C <sub>8</sub> H <sub>18</sub>  | 2-Methylheptane        | 0.017               | Assumed as n-Octane                              |                     |    |
| 24  | C <sub>8</sub> H <sub>18</sub>  | 3-Methylheptane        | 0.017               | Assumed as n-Octane                              |                     |    |
| 25  | C <sub>8</sub> H <sub>18</sub>  | n-Octane               | 0.017               | (Lim and Ziemann, 2009; Presto                   | 0.041               | 1  |
| 26  | C <sub>9</sub> H <sub>20</sub>  | n-Nonane               | 0.021               | et al., 2010)                                    | 0.070               | 1  |
| 27  | C <sub>10</sub> H <sub>22</sub> | n-Decane               | 0.033               |                                                  | 0.030-0.140         | 3  |
| 28  | C <sub>2</sub> H <sub>4</sub>   | Ethylene               | /                   |                                                  |                     |    |
| 29  | C <sub>3</sub> H <sub>6</sub>   | Propylene              | /                   |                                                  |                     |    |
| 30  | C <sub>4</sub> H <sub>8</sub>   | Trans-2-butene         | /                   |                                                  |                     |    |
| 31  | C <sub>4</sub> H <sub>8</sub>   | 1-Butene               | /                   |                                                  |                     |    |
| 32  | C <sub>4</sub> H <sub>8</sub>   | Cis-2-butene           | /                   |                                                  |                     |    |
| 33  | C <sub>5</sub> H <sub>10</sub>  | 1-Pentene              | /                   |                                                  |                     |    |
| 34  | C <sub>5</sub> H <sub>10</sub>  | Trans-2-pentene        | /                   |                                                  |                     |    |
| 35  | C <sub>5</sub> H <sub>10</sub>  | Cis-2-pentene          | /                   |                                                  |                     |    |
| 36  | C <sub>6</sub> H <sub>12</sub>  | 1-Hexene               | /                   |                                                  |                     |    |
| 37  | C <sub>2</sub> H <sub>2</sub>   | Acetylene              | /                   |                                                  |                     |    |
| 38  | C <sub>6</sub> H <sub>6</sub>   | Benzene                | 0.096               | (Li et al., 2016a; Ng et al., 2007)              | 0.078-0.349         | 8  |
| 39  | C <sub>7</sub> H <sub>8</sub>   | Toluene                | 0.200               | (Li et al., 2016a; Ng et al., 2007)              | 0.078-0.196         | 12 |
| 40  | C <sub>8</sub> H <sub>8</sub>   | Styrene                | 0.016               | (Tajuelo et al., 2019)                           | 0.018-0.064         | 24 |
| 41  | C <sub>8</sub> H <sub>10</sub>  | Ethylbenzene           | 0.057               | (Li et al., 2016a)                               | 0.013-0.167         | 7  |
| 42  | C <sub>8</sub> H <sub>10</sub>  | m/p-Xylene             | 0.057               | (Li et al., 2016a; Ng et al., 2007)              | 0.035-0.154         | 44 |
| 43  | C <sub>8</sub> H <sub>10</sub>  | o-Xylene               | 0.057               | (Li et al., 2016a)                               | 0.035-0.108         | 11 |
| 44  | C <sub>9</sub> H <sub>12</sub>  | iso-Propylbenzene      | 0.074               | (Li et al., 2016a)                               | 0.031-0.110         | 4  |
| 45  | C <sub>9</sub> H <sub>12</sub>  | n-Propylbenzene        | 0.074               | (Li et al., 2016a)                               | 0.051-0.054         | 2  |
| 46  | C <sub>9</sub> H <sub>12</sub>  | m-Ethyltoluene         | 0.074               | (Li et al., 2016a)                               | 0.020-0.167         | 9  |
| 47  | C <sub>9</sub> H <sub>12</sub>  | p-Ethyltoluene         | 0.060               | (Li et al., 2016a)                               | 0.039-0.122         | 6  |
| 48  | C <sub>9</sub> H <sub>12</sub>  | 1,3,5-Trimethylbenzene | 0.074               | (Li et al., 2016a)                               | 0.007-0.065         | 5  |
| 49  | C <sub>9</sub> H <sub>12</sub>  | o-Ethyltoluene         | 0.074               | (Li et al., 2016a)                               | 0.141-0.237         | 6  |
| 50  | C <sub>9</sub> H <sub>12</sub>  | 1,2,4-Trimethylbenzene | 0.074               | (Li et al., 2016a)                               | 0.028-0.065         | 9  |
| 51  | C <sub>9</sub> H <sub>12</sub>  | 1,2,3-Trimethylbenzene | 0.074               | (Li et al., 2016a)                               | 0.075-0.119         | 4  |
| 52  | C <sub>10</sub> H <sub>14</sub> | m-Diethylbenzene       | 0.048               | (Li et al., 2016a) (C10aromatics)                | 0.005-0.034         | 5  |
| 53  | C <sub>10</sub> H <sub>14</sub> | p-Diethylbenzene       | 0.048               |                                                  | 0.005-0.034         | 5  |
| 54  | C <sub>5</sub> H <sub>8</sub>   | Isoprene               | 0.440               | (Kleindienst et al., 2006; Carlton et al., 2009) | 0.003-0.017         | 11 |
| 55  | C <sub>10</sub> H <sub>16</sub> | alpha-Pinene           | 0.346               | (Ahlberg et al., 2017)                           | 0.010-0.530         | 12 |
| 56  | C <sub>10</sub> H <sub>16</sub> | beta-Pinene            | 0.346               | Assumed as alpha-Pinene                          |                     |    |
| 57  | C <sub>10</sub> H <sub>16</sub> | Limonene               | 0.346               | Assumed as alpha-Pinene                          |                     |    |
| 58  | C <sub>4</sub> H <sub>6</sub> O | Methacrolein           | /                   |                                                  |                     |    |
| 59  | C <sub>4</sub> H <sub>6</sub> O | Methyl vinyl ketone    | /                   |                                                  |                     |    |
| 60  | C <sub>3</sub> H <sub>4</sub> O | Acrolein               | /                   |                                                  |                     |    |
| 61  | C <sub>3</sub> H <sub>6</sub> O | Propanal               | /                   |                                                  |                     |    |
| 62  | C <sub>3</sub> H <sub>6</sub> O | Acetone                | /                   |                                                  |                     |    |
| 63  | C <sub>4</sub> H <sub>6</sub> O | Crotonaldehyde         | /                   |                                                  |                     |    |
| 64  | C <sub>4</sub> H <sub>8</sub> O | n-Butanal              | /                   |                                                  |                     |    |

|     |                                               |                                            |       |                                                 |             |  |    |
|-----|-----------------------------------------------|--------------------------------------------|-------|-------------------------------------------------|-------------|--|----|
| 65  | C <sub>4</sub> H <sub>8</sub> O               | Methyl ethyl ketone                        | /     |                                                 |             |  |    |
| 66  | C <sub>5</sub> H <sub>10</sub> O              | 2-Pentanone                                | /     |                                                 |             |  |    |
| 67  | C <sub>5</sub> H <sub>10</sub> O              | n-Pentanal                                 | /     |                                                 |             |  |    |
| 68  | C <sub>5</sub> H <sub>10</sub> O              | 3-Pentanone                                | /     |                                                 |             |  |    |
| 69  | C <sub>2</sub> H <sub>4</sub> O               | Acetaldehyde                               | /     |                                                 |             |  |    |
| 70  | CH <sub>2</sub> O                             | Formaldehyde                               | /     |                                                 |             |  |    |
| 71  | C <sub>3</sub> H <sub>4</sub> O <sub>2</sub>  | Methylglyoxal                              | /     |                                                 |             |  |    |
| 72  | C <sub>5</sub> H <sub>4</sub> O               | Cyclopentadienone                          | /     |                                                 |             |  |    |
| 73  | C <sub>5</sub> H <sub>8</sub> O               | EVK, cyclopentanone,<br>dihydromethylfuran | /     |                                                 |             |  |    |
| 74  | C <sub>6</sub> H <sub>12</sub> O              | C6 carbonyls                               | /     |                                                 |             |  |    |
| 75  | C <sub>7</sub> H <sub>6</sub> O               | Benzaldehyde                               | 0.200 | Assumed as toluene                              |             |  |    |
| 76  | C <sub>4</sub> H <sub>4</sub> O               | Furan*                                     | 0.050 | (Gómez Alvarez et al., 2009)                    | 0.019-0.072 |  | 2  |
| 77  | C <sub>5</sub> H <sub>6</sub> O               | Methyl furan                               | 0.070 | (Gómez Alvarez et al., 2009)                    | 0.055-0.085 |  | 2  |
| 78  | C <sub>4</sub> H <sub>4</sub> O <sub>2</sub>  | Furanone                                   | 0.050 | Assumed as furan                                |             |  |    |
| 79  | C <sub>5</sub> H <sub>4</sub> O <sub>2</sub>  | Furfural                                   | 0.050 | Assumed as furan                                |             |  |    |
| 80  | C <sub>6</sub> H <sub>8</sub> O               | Dimethylfuran                              | 0.070 | Assumed as Methyl furan                         |             |  |    |
| 81  | C <sub>5</sub> H <sub>6</sub> O <sub>2</sub>  | 2-Methanol furanone                        | /     |                                                 |             |  |    |
| 82  | C <sub>7</sub> H <sub>10</sub> O              | TriMetfuran                                | 0.070 | Assumed as Methyl furan                         |             |  |    |
| 83  | C <sub>6</sub> H <sub>8</sub> O <sub>2</sub>  | DiMetfuranone                              | 0.070 | Assumed as Methyl furan                         |             |  |    |
| 84  | C <sub>8</sub> H <sub>6</sub> O               | Benzofuran                                 | 0.156 | Assumed as Styrene                              |             |  |    |
| 85  | C <sub>8</sub> H <sub>12</sub> O              | Butylfuran                                 | 0.070 | Assumed as Methyl furan                         |             |  |    |
| 86  | C <sub>6</sub> H <sub>6</sub> O               | Phenol                                     | 0.440 | (Yee et al., 2013)                              | 0.240-0.540 |  | 5  |
| 87  | C <sub>7</sub> H <sub>8</sub> O               | Cresols                                    | 0.360 | (Henry et al., 2008)                            | 0.000-0.420 |  | 25 |
| 88  | C <sub>6</sub> H <sub>6</sub> O <sub>2</sub>  | Benzenediols, methylfurfural               | 0.370 | (Nakao et al., 2011) <sup>b</sup>               | 0.390       |  | 1  |
| 89  | C <sub>8</sub> H <sub>10</sub> O              | C2 phenols                                 | 0.440 | (Nakao et al., 2011) <sup>b</sup>               | 0.130-0.730 |  | 7  |
| 90  | C <sub>7</sub> H <sub>8</sub> O <sub>2</sub>  | Guaiacol, methyl<br>benzenediols           | 0.500 | (Yee et al., 2013)                              | 0.340-0.530 |  | 11 |
| 91  | C <sub>9</sub> H <sub>12</sub> O              | Trimethylphenol                            | 0.440 | Assumed as C2 phenols                           |             |  |    |
| 92  | C <sub>10</sub> H <sub>8</sub> O              | Naphthalenol                               | 0.440 | Assumed as C2 phenols                           |             |  |    |
| 93  | C <sub>10</sub> H <sub>12</sub> O             | Methyl chavicol                            | 0.440 | Assumed as C2 phenols                           |             |  |    |
| 94  | C <sub>8</sub> H <sub>10</sub> O <sub>3</sub> | Syringol                                   | 0.370 | (Yee et al., 2013)                              | 0.110-0.370 |  | 7  |
| 95  | C <sub>10</sub> H <sub>8</sub>                | Naphthalene*                               | 0.263 | (Chan et al., 2009)                             | 0.190-0.300 |  | 5  |
| 96  | C <sub>10</sub> H <sub>10</sub>               | Dihydronaphthalene                         | 0.348 | Assumed as McNap                                |             |  |    |
| 97  | C <sub>11</sub> H <sub>10</sub>               | Methylnaphthalene<br>(MetNap)              | 0.348 | (Chan et al., 2009)                             | 0.190-0.450 |  | 8  |
| 98  | C <sub>12</sub> H <sub>8</sub>                | Acenaphthalene                             | 0.072 | (Shakya et al., 2010)                           | 0.030-0.110 |  | 10 |
| 99  | C <sub>12</sub> H <sub>10</sub>               | Acenaphthene                               | 0.280 | (Shakya et al., 2010)                           | 0.040-0.130 |  | 8  |
| 100 | C <sub>12</sub> H <sub>12</sub>               | Dimethylnaphthalene<br>(diMetNap)          | 0.372 | (Chan et al., 2009)                             | 0.300-0.310 |  | 3  |
| 101 | C <sub>13</sub> H <sub>10</sub>               | Fluorene                                   | 0.372 | Assumed as diMetNap                             |             |  |    |
| 102 | C <sub>14</sub> H <sub>10</sub>               | Phenanthrene, Anthracene                   | 0.372 | Assumed as diMetNap                             |             |  |    |
| 103 | C <sub>16</sub> H <sub>10</sub>               | Pyrene, Fluoranthene                       | 0.372 | Assumed as diMetNap                             |             |  |    |
| 104 | C <sub>8</sub> H <sub>18</sub>                | C8 Alkanes                                 | 0.017 |                                                 | ~0.40       |  | 1  |
| 105 | C <sub>9</sub> H <sub>20</sub>                | C9 Alkanes                                 | 0.021 | (Lim and Ziemann, 2009; Presto<br>et al., 2010) | 0.070       |  | 1  |
| 106 | C <sub>10</sub> H <sub>22</sub>               | C10 Alkanes                                | 0.033 |                                                 | 0.010-0.150 |  | 3  |
| 107 | C <sub>11</sub> H <sub>24</sub>               | C11 Alkanes                                | 0.050 |                                                 | 0.270       |  | 1  |
| 108 | C <sub>12</sub> H <sub>26</sub>               | C12 Alkanes                                | 0.090 | (Presto et al., 2010)                           | ~0.01-0.09  |  | 8  |
| 109 | C <sub>13</sub> H <sub>28</sub>               | C13 Alkanes                                | 0.220 | (Presto et al., 2010) <sup>a</sup>              |             |  |    |
| 110 | C <sub>14</sub> H <sub>30</sub>               | C14 Alkanes                                | 0.300 | (Presto et al., 2010) <sup>a</sup>              |             |  |    |
| 111 | C <sub>15</sub> H <sub>32</sub>               | C15 Alkanes                                | 0.340 | (Presto et al., 2010)                           | ~0.10-0.60  |  | 10 |
| 112 | C <sub>16</sub> H <sub>34</sub>               | C16 Alkanes                                | 0.390 | (Presto et al., 2010) <sup>a</sup>              |             |  |    |
| 113 | C <sub>17</sub> H <sub>36</sub>               | C17 Alkanes                                | 0.430 | (Presto et al., 2010)                           | 0.090-0.510 |  | 10 |
| 114 | C <sub>18</sub> H <sub>38</sub>               | C18 Alkanes                                | 0.430 | Assumed as C17 Alkanes                          |             |  |    |
| 115 | C <sub>19</sub> H <sub>40</sub>               | C19 Alkanes                                | 0.430 | Assumed as C17 Alkanes                          |             |  |    |
| 116 | C <sub>20</sub> H <sub>42</sub>               | C20 Alkanes                                | 0.430 | Assumed as C17 Alkanes                          |             |  |    |
| 117 | C <sub>21</sub> H <sub>44</sub>               | C21 Alkanes                                | 0.430 | Assumed as C17 Alkanes                          |             |  |    |
| 118 | C <sub>2</sub> H <sub>3</sub> N               | Acetonitrile                               | /     |                                                 |             |  |    |
| 119 | C <sub>2</sub> H <sub>5</sub> N               | Ethenamine                                 | /     |                                                 |             |  |    |
| 120 | C <sub>2</sub> H <sub>7</sub> N               | C2 amines                                  | /     |                                                 |             |  |    |
| 121 | C <sub>3</sub> H <sub>3</sub> N               | Acrylonitrile                              | /     |                                                 |             |  |    |
| 122 | C <sub>3</sub> H <sub>5</sub> N               | Propanenitrile                             | /     |                                                 |             |  |    |
| 123 | C <sub>3</sub> H <sub>9</sub> N               | C3 amines                                  | /     |                                                 |             |  |    |
| 124 | C <sub>4</sub> H <sub>5</sub> N               | Pyrrole                                    | /     |                                                 |             |  |    |
| 125 | C <sub>4</sub> H <sub>7</sub> N               | Dihydropyrrole, butane                     | /     |                                                 |             |  |    |

<sup>a</sup>, SOA yields was estimated using the reported two-product parameters (Presto et al., 2010) which derived from the experimental yields of C12 alkanes and C17 alkanes.

<sup>b</sup>, Only SOA yields in the absence of NO<sub>x</sub> were reviewed, which probably underestimate the SOA formation potential (Nakao et al., 2011; Yee et al., 2013).

<sup>c</sup>, “/” in the column “Yield” denotes that these species are not the potential SOA precursors.

**Table S4.** The emission factors (EFs, mg/kg) of benzene for coals and straws reported by other studies.

| Fuel                                     | Combustion facility                            | Combustion Stage                | N <sup>a</sup> | EFs (mg/kg) | Reference               |
|------------------------------------------|------------------------------------------------|---------------------------------|----------------|-------------|-------------------------|
| <b>Coal</b>                              |                                                |                                 |                |             |                         |
| Anthracite coal (Ningxia/Guizhou)        | commercial stove widely used in northern China | a complete burn cycle           | 5              | 2-4.8       | Cai et al. (2019)       |
| Briquette coal (honeycomb)               | metal coal stove with/without a flue           | a complete burn cycle           | 3              | ~2.7-14     | Tsai et al. (2003)      |
| Briquette coal                           | metal coal stove without flue                  | a complete burn cycle           | 1              | 7.4         | Tsai et al. (2003)      |
| Anthracite and bituminous coal           | commercial stove widely used in northern China | residential burning condition   | 5              | 21.5        | Wang et al. (2013)      |
| Bituminous coal (Shenmu/Neimeng/Unknown) | commercial stove widely used in northern China | a complete burn cycle           | 8              | 94-156      | Cai et al. (2019)       |
| Washed coal                              | metal coal stove with a flue                   | a complete burn cycle           | 1              | 440         | Tsai et al. (2003)      |
| Pulverized coal                          | metal coal stove or brick stove with a flue    | a complete burn cycle           | 2              | 25.8-1050   | Tsai et al. (2003)      |
| Bituminous coal                          | commercial stove widely used in northern China | flaming or smoldering stage     | 10             | 58.2-622.2  | Liu et al. (2017)       |
| Bituminous coal                          | domestic cooking stoves                        | flaming or smoldering stage     | /              | 71-724      | Liu et al. (2015)       |
| <b>Straw</b>                             |                                                |                                 |                |             |                         |
| Rice Straw (China)                       | a large indoor combustion room                 | simulated real-world conditions | 9              | 284±115     | Stockwell et al. (2015) |
| Corn cob (China)                         | combustion chamber                             | simulated real-world conditions | 5              | 190         | Wu et al. (2022)        |
| Rice Straw (China)                       | combustion chamber                             | mix of flaming and smoldering   | 1              | 167         | Hatch & al. (2017)      |
| Rice Straw (China)                       | a heat-resistant combustion box                | flaming                         | 6              | 250±100     | Inomata et al. (2015)   |
| Rice Straw (China)                       | a heat-resistant combustion box                | smoldering                      | 8              | 400±100     | Inomata et al. (2015)   |
| Rice Straw (China)                       | a heat-resistant combustion box                | smoldering (wet fuel)           | 4              | 800±500     | Inomata et al. (2015)   |
| Rape Plant (China)                       | a heat-resistant combustion box                | flaming                         | 2              | 220         | Inomata et al. (2015)   |
| Rape Plant (China)                       | a heat-resistant combustion box                | smoldering                      | 4              | 300±100     | Inomata et al. (2015)   |
| Wheat Straw                              | a large indoor combustion room                 | simulated real-world conditions | 6              | 142±40      | Stockwell et al. (2015) |
| wheat residue                            | brick stove with a flue                        | a complete burn cycle           | 1              | 512         | Tsai et al. (2003)      |
| maize residue                            | brick stove with a flue                        | a complete burn cycle           | 2              | 102-194     | Tsai et al. (2003)      |
| Rice Straw                               | Fire Sciences Laboratory facility              | mix of flaming and smoldering   | 1              | 72.6        | Koss et al. (2018)      |

<sup>a</sup>, The number of samples.



**Table S5.** Emission ratio relative to benzene of individual species in different fuels.

| Number | Formula                        | Name                   | Emission ratio ( $\mu\text{g mg}^{-1}$ ) |                |                 |          |            |            |
|--------|--------------------------------|------------------------|------------------------------------------|----------------|-----------------|----------|------------|------------|
|        |                                |                        | Anthracites                              | Briquettes     | Wood            | Corn cob | Corn straw | Bean straw |
| 1      | C <sub>2</sub> H <sub>6</sub>  | Ethane                 | 2713.8 ± 1519.3                          | 1708.6 ± 695.7 | 1049.9 ± 1125.1 | 1047.5   | 2168.9     | 5022.1     |
| 2      | C <sub>3</sub> H <sub>8</sub>  | Propane                | 829.2 ± 389.7                            | 356.6 ± 222.4  | 336.3 ± 390.0   | 392.9    | 453.1      | 1277.8     |
| 3      | C <sub>4</sub> H <sub>10</sub> | Isobutane              | 139.3 ± 84.7                             | 65.5 ± 61.4    | 28.5 ± 26.3     | 27.4     | 37.4       | 61.8       |
| 4      | C <sub>4</sub> H <sub>10</sub> | n-Butane               | 265.4 ± 93.6                             | 122.2 ± 77.3   | 92.4 ± 92.6     | 117.6    | 106.7      | 263.6      |
| 5      | C <sub>5</sub> H <sub>12</sub> | Cyclopentane           | 8.7 ± 2.0                                | 8.5 ± 6.7      | 2.3 ± 2.7       | 2.6      | 2.2        | 9.7        |
| 6      | C <sub>5</sub> H <sub>12</sub> | Isopentane             | 79.1 ± 73.4                              | 53.3 ± 64.3    | 16.1 ± 16.3     | 22.4     | 20.3       | 40.3       |
| 7      | C <sub>5</sub> H <sub>12</sub> | n-Pentane              | 94.9 ± 55.0                              | 52.5 ± 37.2    | 44.4 ± 45.3     | 63.9     | 32.7       | 94.3       |
| 8      | C <sub>6</sub> H <sub>12</sub> | Methylcyclopentane     | 19.4 ± 15.7                              | 10.3 ± 4.7     | 9.4 ± 6.5       | 12.9     | 14.6       | 18.0       |
| 9      | C <sub>6</sub> H <sub>12</sub> | Cyclohexane            | 7.1 ± 3.9                                | 6.1 ± 2.5      | 1.8 ± 1.9       | 1.5      | 1.2        | 2.6        |
| 10     | C <sub>6</sub> H <sub>14</sub> | 2,2-Dimethylbutane     | 0.9 ± 0.7                                | 0.9 ± 0.3      | 0.2 ± 0.2       | 0.2      | 0.2        | 0.4        |
| 11     | C <sub>6</sub> H <sub>14</sub> | 2,3-Dimethylbutane     | 1.3 ± 0.7                                | 1.8 ± 1.5      | 1.4 ± 2.7       | 0.8      | 5.9        | 1.3        |
| 12     | C <sub>6</sub> H <sub>14</sub> | 2-Methylpentane        | 15.1 ± 11.1                              | 10.4 ± 6.0     | 5.1 ± 4.7       | 7.2      | 4.9        | 10.7       |
| 13     | C <sub>6</sub> H <sub>14</sub> | 3-Methylpentane        | 6.1 ± 3.5                                | 4.8 ± 3.6      | 1.8 ± 2.1       | 1.9      | 0.2        | 4.6        |
| 14     | C <sub>6</sub> H <sub>14</sub> | n-Hexane               | 34.2 ± 24.5                              | 22.0 ± 12.4    | 17.3 ± 21.6     | 18.5     | 14.4       | 30.7       |
| 15     | C <sub>7</sub> H <sub>14</sub> | Methylcyclohexane      | 7.8 ± 3.7                                | 7.0 ± 3.0      | 2.4 ± 2.3       | 3.5      | 1.7        | 2.7        |
| 16     | C <sub>7</sub> H <sub>16</sub> | 2,4-Dimethylpentane    | 14.1 ± 14.4                              | 11.7 ± 17.1    | 46.5 ± 119.1    | 0.6      | 16.5       | 856.5      |
| 17     | C <sub>7</sub> H <sub>16</sub> | 2-Methylhexane         | 6.1 ± 4.5                                | 4.3 ± 3.4      | 1.2 ± 0.8       | 2.4      | 2.3        | 5.4        |
| 18     | C <sub>7</sub> H <sub>16</sub> | 2,3-Dimethylpentane    | 5.0 ± 4.9                                | 3.3 ± 3.2      | 1.3 ± 1.4       | 2.5      | 1.3        | 3.4        |
| 19     | C <sub>7</sub> H <sub>16</sub> | 3-Methylhexane         | 3.7 ± 1.9                                | 3.8 ± 3.7      | 1.7 ± 1.1       | 4.8      | 13.0       | 1.6        |
| 20     | C <sub>7</sub> H <sub>16</sub> | n-Heptane              | 27.6 ± 26.0                              | 12.9 ± 12.6    | 16.5 ± 13.4     | 22.0     | 8.3        | 15.3       |
| 21     | C <sub>8</sub> H <sub>18</sub> | 2,2,4-Trimethylpentane | 0.9 ± 0.9                                | 1.5 ± 2.9      | 0.5 ± 0.8       | 0.1      | 9.1        | 0.2        |

|    |                                 |                        |                |                 |                 |        |         |        |
|----|---------------------------------|------------------------|----------------|-----------------|-----------------|--------|---------|--------|
| 22 | C <sub>8</sub> H <sub>18</sub>  | 2,3,4-Trimethylpentane | 1.9 ± 1.8      | 2.2 ± 2.8       | 0.3 ± 0.3       | 0.1    | 0.1     | 0.6    |
| 23 | C <sub>8</sub> H <sub>18</sub>  | 2-Methylheptane        | 12.3 ± 11.0    | 8.2 ± 6.9       | 4.9 ± 3.9       | 6.6    | 3.1     | 4.0    |
| 24 | C <sub>8</sub> H <sub>18</sub>  | 3-Methylheptane        | 9.4 ± 7.8      | 4.6 ± 3.7       | 3.2 ± 2.1       | 3.1    | 2.1     | 2.5    |
| 25 | C <sub>8</sub> H <sub>18</sub>  | n-Octane               | 34.7 ± 23.2    | 25.2 ± 14.6     | 15.2 ± 11.6     | 18.2   | 9.6     | 10.2   |
| 26 | C <sub>9</sub> H <sub>20</sub>  | n-Nonane               | 26.8 ± 18.7    | 21.7 ± 15.4     | 9.0 ± 8.1       | 11.4   | 4.3     | 2.4    |
| 27 | C <sub>10</sub> H <sub>22</sub> | n-Decane               | 34.0 ± 21.9    | 35.4 ± 28.3     | 7.6 ± 6.2       | 7.5    | 3.9     | 4.4    |
| 28 | C <sub>2</sub> H <sub>4</sub>   | Ethylene               | 1944.1 ± 957.8 | 2019.3 ± 1089.0 | 3019.6 ± 1283.7 | 2429.3 | 20434.6 | 5954.7 |
| 29 | C <sub>3</sub> H <sub>6</sub>   | Propylene              | 845.8 ± 567.7  | 465.8 ± 338.0   | 993.0 ± 670.6   | 1052.1 | 3463.9  | 3077.6 |
| 30 | C <sub>4</sub> H <sub>8</sub>   | Trans-2-butene         | 86.6 ± 68.6    | 33.3 ± 36.9     | 72.7 ± 82.1     | 79.1   | 126.2   | 303.6  |
| 31 | C <sub>4</sub> H <sub>8</sub>   | 1-Butene               | 170.3 ± 131.3  | 85.6 ± 75.4     | 221.8 ± 162.6   | 277.3  | 513.5   | 627.0  |
| 32 | C <sub>4</sub> H <sub>8</sub>   | Cis-2-butene           | 61.3 ± 46.2    | 24.2 ± 26.8     | 52.4 ± 58.0     | 56.9   | 93.4    | 218.9  |
| 33 | C <sub>5</sub> H <sub>10</sub>  | 1-Pentene              | 43.1 ± 35.9    | 26.0 ± 20.1     | 60.4 ± 57.0     | 73.8   | 76.9    | 109.5  |
| 34 | C <sub>5</sub> H <sub>10</sub>  | Trans-2-pentene        | 30.2 ± 25.3    | 15.3 ± 12.7     | 25.9 ± 28.8     | 25.6   | 42.2    | 92.1   |
| 35 | C <sub>5</sub> H <sub>10</sub>  | Cis-2-pentene          | 26.2 ± 19.3    | 9.7 ± 6.6       | 14.8 ± 16.4     | 15.9   | 20.7    | 52.8   |
| 36 | C <sub>6</sub> H <sub>12</sub>  | 1-Hexene               | 65.6 ± 71.6    | 41.0 ± 30.4     | 92.4 ± 73.3     | 157.8  | 149.1   | 110.2  |
| 37 | C <sub>2</sub> H <sub>2</sub>   | Acetylene              | 259.2 ± 181.4  | 631.5 ± 422.2   | 1259.7 ± 598.9  | 590.4  | 1751.7  | 1026.2 |
| 38 | C <sub>6</sub> H <sub>6</sub>   | Benzene                | 1000.0 ± 0.0   | 1000.0 ± 0.0    | 1000.0 ± 0.0    | 1000.0 | 1000.0  | 1000.0 |
| 39 | C <sub>7</sub> H <sub>8</sub>   | Toluene                | 567.3 ± 233.2  | 356.9 ± 146.8   | 362.3 ± 183.2   | 267.8  | 786.0   | 317.7  |
| 40 | C <sub>8</sub> H <sub>8</sub>   | Styrene                | 129.0 ± 123.4  | 83.8 ± 39.0     | 80.9 ± 50.7     | 74.5   | 355.4   | 16.7   |
| 41 | C <sub>8</sub> H <sub>10</sub>  | Ethylbenzene           | 79.3 ± 51.2    | 58.0 ± 24.5     | 53.1 ± 26.3     | 37.3   | 123.3   | 16.3   |
| 42 | C <sub>8</sub> H <sub>10</sub>  | m/p-Xylene             | 238.5 ± 136.0  | 144.3 ± 72.4    | 76.8 ± 54.2     | 68.1   | 97.0    | 49.2   |
| 43 | C <sub>8</sub> H <sub>10</sub>  | o-Xylene               | 82.2 ± 47.5    | 53.9 ± 26.9     | 28.9 ± 21.4     | 21.0   | 40.7    | 16.0   |
| 44 | C <sub>9</sub> H <sub>12</sub>  | iso-Propylbenzene      | 7.1 ± 4.6      | 9.0 ± 9.1       | 2.5 ± 1.2       | 1.7    | 7.1     | 1.1    |
| 45 | C <sub>9</sub> H <sub>12</sub>  | n-Propylbenzene        | 18.9 ± 12.7    | 19.5 ± 15.4     | 6.2 ± 4.2       | 4.8    | 7.8     | 2.2    |
| 46 | C <sub>9</sub> H <sub>12</sub>  | m-Ethyltoluene         | 42.6 ± 31.4    | 32.8 ± 20.4     | 11.1 ± 7.6      | 9.1    | 12.6    | 5.3    |
| 47 | C <sub>9</sub> H <sub>12</sub>  | p-Ethyltoluene         | 30.5 ± 22.5    | 26.5 ± 20.0     | 7.4 ± 4.9       | 6.6    | 7.1     | 4.1    |
| 48 | C <sub>9</sub> H <sub>12</sub>  | 1,3,5-Trimethylbenzene | 23.7 ± 16.6    | 21.9 ± 16.8     | 5.3 ± 4.3       | 4.3    | 3.0     | 2.7    |
| 49 | C <sub>9</sub> H <sub>12</sub>  | o-Ethyltoluene         | 28.1 ± 19.9    | 25.7 ± 19.7     | 7.8 ± 5.6       | 5.0    | 7.8     | 3.2    |
| 50 | C <sub>9</sub> H <sub>12</sub>  | 1,2,4-Trimethylbenzene | 70.0 ± 56.8    | 48.1 ± 31.8     | 14.5 ± 11.8     | 9.9    | 10.0    | 7.3    |



|    |                                              |                                         |                 |                 |                 |              |              |              |
|----|----------------------------------------------|-----------------------------------------|-----------------|-----------------|-----------------|--------------|--------------|--------------|
| 51 | C <sub>9</sub> H <sub>12</sub>               | 1,2,3-Trimethylbenzene                  | 48.4 ± 39.4     | 41.9 ± 33.2     | 8.3 ± 6.2       | 5.9          | 4.5          | 4.6          |
| 52 | C <sub>10</sub> H <sub>14</sub>              | m-Diethylbenzene                        | 12.2 ± 8.5      | 20.2 ± 26.7     | 1.5 ± 0.9       | 0.8          | 1.0          | 1.9          |
| 53 | C <sub>10</sub> H <sub>14</sub>              | p-Diethylbenzene                        | 29.2 ± 23.4     | 30.6 ± 29.6     | 4.1 ± 2.9       | 2.6          | 2.4          | 3.7          |
| 54 | C <sub>5</sub> H <sub>8</sub>                | Isoprene                                | 24.7 ± 21.0     | 11.7 ± 17.4     | 24.5 ± 42.5     | 7.7          | 11.5         | 291.9        |
| 55 | C <sub>10</sub> H <sub>16</sub>              | alpha-Pinene                            | 3.7 ± 4.4       | 1.0 ± 0.7       | 1.0 ± 1.3       | 0.5          | 0.7          | 0.3          |
| 56 | C <sub>10</sub> H <sub>16</sub>              | beta-Pinene                             | 2.8 ± 4.3       | 0.5 ± 0.5       | 0.5 ± 0.5       | 0.3          | 0.2          | 0.3          |
| 57 | C <sub>10</sub> H <sub>16</sub>              | Cinene (Limonene)                       | 193.6 ± 264.8   | 69.3 ± 58.5     | 86.2 ± 115.7    | 119.1        | 6.9          | 13.5         |
| 58 | C <sub>4</sub> H <sub>6</sub> O              | Methacrolein                            | 189.6 ± 162.7   | 122.8 ± 86.7    | 220.5 ± 156.1   | 266.3        | 525.3        | 414.1        |
| 59 | C <sub>4</sub> H <sub>6</sub> O              | Methyl vinyl ketone                     | 933.7 ± 1094.1  | 377.8 ± 315.3   | 592.0 ± 304.9   | 785.5        | 1469.5       | 1072.1       |
| 60 | C <sub>3</sub> H <sub>4</sub> O              | Acrolein                                | 2653.4 ± 2492.5 | 1664.7 ± 1313.5 | 2492.8 ± 1229.3 | 2683.4       | 7437.6       | 6116.1       |
| 61 | C <sub>3</sub> H <sub>6</sub> O              | Propanal                                | 838.9 ± 646.7   | 464.9 ± 420.5   | 969.7 ± 502.8   | 1151.0       | 1792.8       | 2980.5       |
| 62 | C <sub>3</sub> H <sub>6</sub> O              | Acetone                                 | 8404.5 ± 8112.2 | 2526.9 ± 1872.0 | 3826.5 ± 3651.0 | 3681.0       | 4654.4       | 12189.5      |
| 63 | C <sub>4</sub> H <sub>6</sub> O              | Crotonaldehyde                          | 676.5 ± 755.0   | 327.2 ± 324.3   | 233.7 ± 131.9   | 61.1         | 531.1        | 274.7        |
| 64 | C <sub>4</sub> H <sub>8</sub> O              | n-Butanal                               | 165.6 ± 121.6   | 131.8 ± 159.0   | 136.0 ± 94.9    | 177.5        | 229.6        | 301.0        |
| 65 | C <sub>4</sub> H <sub>8</sub> O              | Methyl ethyl ketone                     | 1746.3 ± 1795.9 | 502.6 ± 467.5   | 762.5 ± 729.0   | 1086.5       | 1093.7       | 1858.9       |
| 66 | C <sub>5</sub> H <sub>10</sub> O             | 2-Pentanone                             | 164.7 ± 162.1   | 47.4 ± 44.2     | 58.5 ± 51.5     | 53.8         | 47.9         | 100.9        |
| 67 | C <sub>5</sub> H <sub>10</sub> O             | n-Pentanal                              | 197.1 ± 186.5   | 170.2 ± 208.4   | 108.2 ± 53.2    | 156.3        | 109.7        | 74.0         |
| 68 | C <sub>5</sub> H <sub>10</sub> O             | 3-Pentanone                             | 55.8 ± 53.2     | 15.7 ± 14.7     | 22.5 ± 19.0     | 26.2         | 21.9         | 35.7         |
| 69 | C <sub>2</sub> H <sub>4</sub> O              | Acetaldehyde                            | 942.7 ± 748.7   | 605.1 ± 389.0   | 1054.3 ± 569.9  | 1432.2       | 1825.6       | 3554.3       |
| 70 | CH <sub>2</sub> O                            | Formaldehyde                            | 2125 ± 581.1    | 2125 ± 581.1    | 2856 ± 532.9    | 2848 ± 555.3 | 2848 ± 555.3 | 2848 ± 555.3 |
| 71 | C <sub>3</sub> H <sub>4</sub> O <sub>2</sub> | Methylglyoxal                           | 78.9 ± 85.1     | 70.5 ± 66.7     | 13.9 ± 8.8      | 12.3         | 18.0         | 62.2         |
| 72 | C <sub>5</sub> H <sub>4</sub> O              | Cyclopentadienone                       | 1336.1 ± 2106.0 | 112.3 ± 138.7   | 66.8 ± 96.9     | 65.3         | 121.2        | 33.0         |
| 73 | C <sub>5</sub> H <sub>8</sub> O              | EVK, Dihydromethylfuran, cyclopentanone | 1839.1 ± 2062.5 | 330.1 ± 408.8   | 414.2 ± 357.3   | 457.6        | 409.2        | 550.7        |
| 74 | C <sub>6</sub> H <sub>12</sub> O             | C6 carbonyls                            | 515.1 ± 616.9   | 96.3 ± 71.1     | 99.6 ± 53.8     | 79.5         | 81.3         | 88.0         |
| 75 | C <sub>7</sub> H <sub>6</sub> O              | Benzaldehyde                            | 337.9 ± 380.3   | 103.4 ± 51.1    | 71.2 ± 36.1     | 65.3         | 113.1        | 8.8          |
| 76 | C <sub>4</sub> H <sub>4</sub> O              | Furan                                   | 1489.0 ± 1726.1 | 451.8 ± 780.5   | 741.1 ± 835.3   | 713.8        | 920.7        | 1872.7       |
| 77 | C <sub>5</sub> H <sub>6</sub> O              | Methylfuran                             | 5654.4 ± 7399.9 | 954.4 ± 1275.5  | 987.4 ± 1258.0  | 883.3        | 763.2        | 2035.8       |
| 78 | C <sub>4</sub> H <sub>4</sub> O <sub>2</sub> | Furanone                                | 744.7 ± 873.2   | 176.1 ± 115.8   | 58.1 ± 50.8     | 87.4         | 66.1         | 17.9         |

|     |                                               |                              |                   |                 |               |       |       |       |
|-----|-----------------------------------------------|------------------------------|-------------------|-----------------|---------------|-------|-------|-------|
| 79  | C <sub>5</sub> H <sub>4</sub> O <sub>2</sub>  | Furfural                     | 14120.4 ± 18694.4 | 1457.6 ± 1830.3 | 920.7 ± 987.8 | 662.8 | 495.6 | 187.6 |
| 80  | C <sub>6</sub> H <sub>8</sub> O               | Dimethylfuran                | 3903.1 ± 5098.9   | 569.7 ± 513.1   | 373.3 ± 428.7 | 312.8 | 229.0 | 345.1 |
| 81  | C <sub>5</sub> H <sub>6</sub> O <sub>2</sub>  | 2-Methanol furanone          | 1188.0 ± 1534.8   | 197.4 ± 133.5   | 86.8 ± 91.8   | 90.8  | 99.9  | 30.8  |
| 82  | C <sub>7</sub> H <sub>10</sub> O              | Trimethylfuran               | 2317.1 ± 3058.2   | 347.4 ± 284.7   | 165.2 ± 188.9 | 134.2 | 69.8  | 55.2  |
| 83  | C <sub>6</sub> H <sub>8</sub> O <sub>2</sub>  | Dimethylfuranone             | 944.6 ± 1281.7    | 187.2 ± 132.9   | 67.7 ± 62.9   | 65.2  | 93.2  | 22.2  |
| 84  | C <sub>8</sub> H <sub>6</sub> O               | Benzofuran                   | 231.3 ± 246.8     | 67.5 ± 54.5     | 59.1 ± 44.3   | 41.6  | 87.8  | 4.7   |
| 85  | C <sub>8</sub> H <sub>12</sub> O              | Butylfuran                   | 1083.4 ± 1458.3   | 167.0 ± 139.4   | 67.2 ± 74.8   | 51.7  | 22.5  | 13.2  |
| 86  | C <sub>6</sub> H <sub>6</sub> O               | Phenol                       | 3762.9 ± 5889.4   | 574.3 ± 526.1   | 443.5 ± 451.8 | 258.1 | 908.1 | 281.9 |
| 87  | C <sub>7</sub> H <sub>8</sub> O               | Cresols                      | 2017.8 ± 3924.1   | 166.0 ± 277.1   | 76.9 ± 150.0  | 41.5  | 24.5  | 25.3  |
| 88  | C <sub>6</sub> H <sub>6</sub> O <sub>2</sub>  | Benzenediols, methylfurfural | 3372.0 ± 4703.2   | 407.2 ± 292.3   | 175.9 ± 196.4 | 114.2 | 118.2 | 38.5  |
| 89  | C <sub>8</sub> H <sub>10</sub> O              | C2 phenols                   | 1248.1 ± 2563.9   | 94.9 ± 151.4    | 35.1 ± 54.5   | 24.3  | 12.6  | 8.5   |
| 90  | C <sub>7</sub> H <sub>8</sub> O <sub>2</sub>  | Guaiacol                     | 1995.4 ± 4089.5   | 128.8 ± 143.4   | 41.2 ± 43.9   | 26.3  | 26.8  | 8.7   |
| 91  | C <sub>9</sub> H <sub>12</sub> O              | Trimethylphenol              | 432.0 ± 795.3     | 36.5 ± 42.0     | 14.6 ± 19.3   | 10.0  | 4.8   | 3.0   |
| 92  | C <sub>10</sub> H <sub>8</sub> O              | Naphthalenol                 | 132.5 ± 185.6     | 32.5 ± 22.6     | 5.9 ± 7.2     | 3.5   | 2.8   | 7.2   |
| 93  | C <sub>10</sub> H <sub>12</sub> O             | methyl chavicol              | 173.9 ± 230.0     | 40.3 ± 29.1     | 10.4 ± 11.9   | 6.7   | 2.7   | 4.3   |
| 94  | C <sub>8</sub> H <sub>10</sub> O <sub>3</sub> | Syringol                     | 40.7 ± 50.8       | 21.2 ± 18.8     | 2.6 ± 2.8     | 1.1   | 1.3   | 0.5   |
| 95  | C <sub>10</sub> H <sub>8</sub>                | naphthalene                  | 2325.2 ± 1892.3   | 1790.4 ± 1896.7 | 176.4 ± 105.6 | 107.0 | 126.8 | 540.0 |
| 96  | C <sub>10</sub> H <sub>10</sub>               | Dihydronaphthalene           | 94.6 ± 92.4       | 40.3 ± 39.3     | 18.0 ± 20.5   | 12.8  | 9.0   | 2.5   |
| 97  | C <sub>11</sub> H <sub>10</sub>               | Methylnaphthalene            | 560.8 ± 625.0     | 188.8 ± 271.0   | 42.6 ± 49.9   | 28.8  | 9.2   | 14.0  |
| 98  | C <sub>12</sub> H <sub>8</sub>                | Acenaphthylene               | 109.4 ± 217.4     | 13.2 ± 15.9     | 2.7 ± 5.2     | 0.9   | 0.6   | 1.3   |
| 99  | C <sub>12</sub> H <sub>10</sub>               | Acenaphthene                 | 250.6 ± 313.4     | 95.7 ± 74.7     | 18.9 ± 20.5   | 9.7   | 8.4   | 5.8   |
| 100 | C <sub>12</sub> H <sub>12</sub>               | Dimethylnaphthalene          | 308.7 ± 370.9     | 115.3 ± 178.4   | 29.5 ± 37.8   | 15.9  | 4.1   | 9.5   |
| 101 | C <sub>13</sub> H <sub>10</sub>               | Fluorene                     | 20.5 ± 30.7       | 9.7 ± 13.2      | 1.6 ± 1.4     | 0.6   | 0.6   | 4.7   |
| 102 | C <sub>14</sub> H <sub>10</sub>               | Phenanthrene, Anthracene     | 6.4 ± 6.6         | 3.6 ± 3.1       | 0.6 ± 0.5     | 0.1   | 0.3   | 0.7   |
| 103 | C <sub>16</sub> H <sub>10</sub>               | Pyrene, Fluoranthene         | 0.6 ± 0.7         | 0.2 ± 0.1       | 0.1 ± 0.1     | 0.0   | 0.1   | 0.0   |
| 104 | C <sub>8</sub> H <sub>18</sub>                | C8 Alkanes                   | 161.2 ± 109.4     | 169.3 ± 151.2   | 58.1 ± 39.3   | 72.0  | 35.0  | 48.7  |
| 105 | C <sub>9</sub> H <sub>20</sub>                | C9 Alkanes                   | 134.1 ± 97.6      | 141.0 ± 128.4   | 49.4 ± 32.2   | 70.8  | 23.0  | 22.5  |
| 106 | C <sub>10</sub> H <sub>22</sub>               | C10 Alkanes                  | 106.5 ± 73.9      | 111.6 ± 101.2   | 36.3 ± 28.2   | 45.4  | 16.2  | 12.6  |
| 107 | C <sub>11</sub> H <sub>24</sub>               | C11 Alkanes                  | 84.3 ± 65.3       | 93.9 ± 91.0     | 28.2 ± 21.4   | 31.3  | 9.6   | 10.5  |

|     |                                 |                                              |                 |                 |                 |        |        |        |
|-----|---------------------------------|----------------------------------------------|-----------------|-----------------|-----------------|--------|--------|--------|
| 108 | C <sub>12</sub> H <sub>26</sub> | C12 Alkanes                                  | 96.5 ± 86.3     | 107.4 ± 95.3    | 23.0 ± 17.5     | 16.9   | 3.4    | 9.6    |
| 109 | C <sub>13</sub> H <sub>28</sub> | C13 Alkanes                                  | 164.5 ± 151.8   | 176.6 ± 153.1   | 29.0 ± 24.5     | 18.3   | 1.3    | 11.4   |
| 110 | C <sub>14</sub> H <sub>30</sub> | C14 Alkanes                                  | 298.0 ± 300.5   | 306.3 ± 288.7   | 43.0 ± 45.3     | 26.0   | 4.6    | 21.3   |
| 111 | C <sub>15</sub> H <sub>32</sub> | C15 Alkanes                                  | 497.7 ± 515.5   | 723.1 ± 933.1   | 73.1 ± 78.4     | 46.3   | 6.7    | 42.3   |
| 112 | C <sub>16</sub> H <sub>34</sub> | C16 Alkanes                                  | 354.9 ± 370.6   | 562.7 ± 783.3   | 46.3 ± 47.1     | 28.6   | 2.9    | 32.7   |
| 113 | C <sub>17</sub> H <sub>36</sub> | C17 Alkanes                                  | 216.9 ± 210.3   | 265.8 ± 327.3   | 24.1 ± 20.0     | 10.8   | 1.5    | 29.5   |
| 114 | C <sub>18</sub> H <sub>38</sub> | C18 Alkanes                                  | 161.7 ± 156.8   | 153.5 ± 147.5   | 17.9 ± 14.2     | 7.9    | 0.9    | 27.4   |
| 115 | C <sub>19</sub> H <sub>40</sub> | C19 Alkanes                                  | 96.7 ± 91.4     | 72.4 ± 55.9     | 10.8 ± 8.5      | 4.9    | 0.5    | 15.4   |
| 116 | C <sub>20</sub> H <sub>42</sub> | C20 Alkanes                                  | 57.0 ± 49.4     | 44.1 ± 44.2     | 6.4 ± 4.9       | 2.7    | 0.2    | 13.3   |
| 117 | C <sub>21</sub> H <sub>44</sub> | C21 Alkanes                                  | 41.0 ± 34.3     | 33.6 ± 38.6     | 4.2 ± 3.0       | 2.8    | 0.1    | 9.9    |
| 118 | C <sub>2</sub> H <sub>3</sub> N | Acetonitrile                                 | 3273.2 ± 2921.0 | 2628.6 ± 1550.5 | 1879.6 ± 1117.9 | 2003.1 | 5377.2 | 3826.7 |
| 119 | C <sub>2</sub> H <sub>5</sub> N | Ethenamine                                   | 4.8 ± 5.5       | 2.3 ± 1.5       | 1.1 ± 0.6       | 1.6    | 2.0    | 3.3    |
| 120 | C <sub>2</sub> H <sub>7</sub> N | Dimethylamine, Ethylamine                    | 2.2 ± 2.2       | 1.2 ± 0.8       | 1.5 ± 3.5       | 0.1    | 0.4    | 0.3    |
| 121 | C <sub>3</sub> H <sub>3</sub> N | Acrylonitrile                                | 163.7 ± 153.7   | 315.3 ± 301.7   | 386.6 ± 344.1   | 301.1  | 3491.1 | 146.9  |
| 122 | C <sub>3</sub> H <sub>5</sub> N | Propanenitrile                               | 170.5 ± 232.1   | 69.9 ± 54.8     | 144.3 ± 141.0   | 188.6  | 685.1  | 144.0  |
| 123 | C <sub>3</sub> H <sub>9</sub> N | C3 amines                                    | 1.0 ± 1.2       | 0.6 ± 0.6       | 0.1 ± 0.1       | 0.0    | 0.2    | 0.2    |
| 124 | C <sub>4</sub> H <sub>5</sub> N | Pyrrole                                      | 326.8 ± 425.7   | 70.4 ± 135.3    | 104.9 ± 96.0    | 163.5  | 474.6  | 38.7   |
| 125 | C <sub>4</sub> H <sub>7</sub> N | Dihydropyrrole,<br>butane nitrile, pyrroline | 47.7 ± 62.8     | 21.2 ± 17.7     | 47.4 ± 49.6     | 68.7   | 168.4  | 31.8   |

**Table S6.** Annual consumption of residential coal and biomass combustion in China mainland.

| Year | Residential coal consumption<br>(10 <sup>4</sup> t) | Biomass combustion<br>(10 <sup>8</sup> t) |
|------|-----------------------------------------------------|-------------------------------------------|
| 2010 | 9159                                                | 3.1                                       |
| 2011 | 9212                                                | 3.1                                       |
| 2012 | 9253                                                | 3.0                                       |
| 2013 | 9290                                                | 2.9                                       |
| 2014 | 9303                                                | 2.8                                       |
| 2015 | 9627                                                | 2.7                                       |
| 2016 | 9492                                                | 2.6                                       |
| 2017 | 9283                                                | 2.2                                       |
| 2018 | 7714                                                | 2.3                                       |
| 2019 | 6547                                                | 2.2                                       |

**Table S7.** Annual consumption of residential coal and biomass combustion by province in 2019 and 2017, respectively.

| NO. | Region                | Residential coal consumption<br>(10 <sup>4</sup> t) | Biomass<br>combustion<br>(10 <sup>4</sup> t) |
|-----|-----------------------|-----------------------------------------------------|----------------------------------------------|
| 1   | Beijing               | 48.7                                                | 5.1                                          |
| 2   | Tianjin               | 38.2                                                | 60.1                                         |
| 3   | Hebei <sup>a</sup>    | 1313.3                                              | 178.8                                        |
| 4   | Shanxi                | 422.7                                               | 288.2                                        |
| 5   | Inner Mongolia        | 333.7                                               | 60.1                                         |
| 6   | Liaoning <sup>a</sup> | 413.6                                               | 244.4                                        |
| 7   | Jilin                 | 188.5                                               | 1242.9                                       |
| 8   | Heilongjiang          | 273.2                                               | 2845.7                                       |
| 9   | Shanghai              | 4.1                                                 | 20.2                                         |
| 10  | Jiangsu               | -                                                   | 1470.1                                       |
| 11  | Zhejiang              | 28.2                                                | 163.9                                        |
| 12  | Anhui                 | 35.0                                                | 1480.3                                       |
| 13  | Fujian                | 21.4                                                | 104.1                                        |
| 14  | Jiangxi               | 250.1                                               | 894.1                                        |
| 15  | Shandong              | 478.7                                               | 1600.0                                       |
| 16  | Henan                 | 331.6                                               | 1700.0                                       |
| 17  | Hubei                 | 501.5                                               | 1138.1                                       |
| 18  | Hunan                 | 408.4                                               | 1488.5                                       |
| 19  | Guangdong             | 65.9                                                | 862.7                                        |
| 20  | Guangxi               | 0.9                                                 | 970.0                                        |
| 21  | Hainan                | -                                                   | 101.4                                        |
| 22  | Chongqing             | 48.1                                                | 208.8                                        |
| 23  | Sichuan               | 72.1                                                | 800.0                                        |
| 24  | Guizhou               | 494.0                                               | 144.0                                        |
| 25  | Yunnan                | 327.7                                               | 500.0                                        |
| 26  | Tibet                 | -                                                   | -                                            |
| 27  | Shaanxi               | 284.7                                               | 244.1                                        |
| 28  | Gansu                 | 327.5                                               | 210.2                                        |
| 29  | Qinghai               | 65.0                                                | 23.3                                         |
| 30  | Ningxia               | 40.3                                                | 78.6                                         |
| 31  | Xinjiang              | 465.9                                               | 642.0                                        |
| 32  | National              | 6547.0                                              | 22000.0                                      |

<sup>a</sup>, Consumption from biomass combustion in Hebei and Liaoning are from 2020 statistic data.

## Reference

Ahlberg, E., Falk, J., Eriksson, A., Holst, T., Brune, W. H., Kristensson, A., Roldin, P., and Svenningsson, B.: Secondary organic aerosol from VOC mixtures in an oxidation flow reactor, *Atmospheric Environment*, 161, 210-220, 10.1016/j.atmosenv.2017.05.005, 2017.

Akherati, A., He, Y., Coggon, M. M., Koss, A. R., Hodshire, A. L., Sekimoto, K., Warneke, C., de Gouw, J., Yee, L., Seinfeld, J. H., Onasch, T. B., Herndon, S. C., Knighton, W. B., Cappa, C. D., Kleeman, M. J., Lim, C. Y., Kroll, J. H., Pierce, J. R., and Jathar, S. H.: Oxygenated aromatic compounds are important precursors of secondary organic aerosol in biomass-burning emissions, *Environ Sci Technol*, doi.10.1021/acs.est.1020c01345, 10.1021/acs.est.0c01345, 2020.

Bruns, E. A., Slowik, J. G., El Haddad, I., Kilic, D., Klein, F., Dommen, J., Temime-Roussel, B., Marchand, N., Baltensperger, U., and Prevot, A. S. H.: Characterization of gas-phase organics using proton transfer reaction time-of-flight mass spectrometry: fresh and aged residential wood combustion emissions, *Atmospheric Chemistry and Physics*, 17, 705-720, 10.5194/acp-17-705-2017, 2017.

Cai, S., Zhu, L., Wang, S., Wisthaler, A., Li, Q., Jiang, J., and Hao, J.: Time-Resolved Intermediate-Volatility and Semivolatile Organic Compound Emissions from Household Coal Combustion in Northern China, *Environmental Science & Technology*, 53, 9269-9278, 10.1021/acs.est.9b00734, 2019.

Carlton, A. G., Wiedinmyer, C., and Kroll, J. H.: A review of Secondary Organic Aerosol (SOA) formation from isoprene, *Atmospheric Chemistry and Physics*, 9, 4987-5005, 2009.

Chan, A. W. H., Kautzman, K. E., Chhabra, P. S., Surratt, J. D., Chan, M. N., Crouse, J. D., Kuerten, A., Wennberg, P. O., Flagan, R. C., and Seinfeld, J. H.: Secondary organic aerosol formation from photooxidation of naphthalene and alkyl naphthalenes: implications for oxidation of intermediate volatility organic compounds (IVOCs), *Atmospheric Chemistry and Physics*, 9, 3049-3060, 10.5194/acp-9-3049-2009, 2009.

Gilman, J. B., Lerner, B. M., Kuster, W. C., Goldan, P. D., Warneke, C., Veres, P. R., Roberts, J. M., de Gouw, J. A., Burling, I. R., and Yokelson, R. J.: Biomass burning emissions and potential air quality impacts of volatile organic compounds and other trace gases from fuels common in the US, *Atmospheric Chemistry and Physics*, 15, 13915-13938, 10.5194/acp-15-13915-2015, 2015.

Gómez Alvarez, E., Borrás, E., Viidanoja, J., and Hjorth, J.: Unsaturated dicarbonyl products from the OH-initiated photo-oxidation of furan, 2-methylfuran and 3-methylfuran, *Atmospheric Environment*, 43, 1603-1612, <https://doi.org/10.1016/j.atmosenv.2008.12.019>, 2009.

Hatch, L. E., Yokelson, R. J., Stockwell, C. E., Veres, P. R., Simpson, I. J., Blake, D. R., Orlando, J. J., and Barsanti, K. C.: Multi-instrument comparison and compilation of non-methane organic gas emissions from biomass burning and implications for smoke-derived secondary organic aerosol precursors, *Atmospheric Chemistry and Physics*, 17, 1471-1489, 10.5194/acp-17-1471-2017, 2017.

Henry, F., Coeur-Tourneur, C., Ledoux, F., Tomas, A., and Menu, D.: Secondary organic aerosol formation from the gas phase reaction of hydroxyl radicals with m-, o- and p-cresol, *Atmospheric Environment*, 42, 3035-3045, <https://doi.org/10.1016/j.atmosenv.2007.12.043>, 2008.

Inomata, S., Tanimoto, H., Pan, X., Taketani, F., Komazaki, Y., Miyakawa, T., Kanaya, Y., and Wang, Z.: Laboratory measurements of emission factors of nonmethane volatile organic compounds from burning of Chinese crop residues, *Journal of Geophysical Research: Atmospheres*, 120, 5237-5252, 10.1002/2014jd022761, 2015.

Kleindienst, T. E., Edney, E. O., Lewandowski, M., Offenberg, J. H., and Jaoui, M.: Secondary organic carbon and aerosol yields from the irradiations of isoprene and alpha-pinene in the presence of NO<sub>x</sub> and SO<sub>2</sub>, *Environmental Science & Technology*, 40, 3807-3812, 10.1021/es052446r, 2006.

Koss, A. R., Sekimoto, K., Gilman, J. B., Selimovic, V., Coggon, M. M., Zarzana, K. J., Yuan, B., Lerner, B. M., Brown, S. S., Jimenez, J. L., Krechmer, J., Roberts, J. M., Warneke, C., Yokelson, R. J., and de Gouw, J.: Non-methane organic gas emissions from biomass burning: identification, quantification, and emission factors from PTR-ToF during the FIREX 2016 laboratory experiment, *Atmospheric Chemistry and Physics*, 18, 3299-3319, 10.5194/acp-18-3299-2018, 2018.

Li, L., Tang, P., Nakao, S., Kacarab, M., and Cocker, D. R., III: Novel Approach for Evaluating Secondary

Organic Aerosol from Aromatic Hydrocarbons: Unified Method for Predicting Aerosol Composition and Formation, *Environmental Science & Technology*, 50, 6249-6256, 10.1021/acs.est.5b05778, 2016a.

Li, Q., Jiang, J., Zhang, Q., Zhou, W., Cai, S., Duan, L., Ge, S., and Hao, J.: Influences of coal size, volatile matter content, and additive on primary particulate matter emissions from household stove combustion, *Fuel*, 182, 780-787, <https://doi.org/10.1016/j.fuel.2016.06.059>, 2016b.

Lim, Y. B. and Ziemann, P. J.: Effects of Molecular Structure on Aerosol Yields from OH Radical-Initiated Reactions of Linear, Branched, and Cyclic Alkanes in the Presence of NO<sub>x</sub>, *Environmental Science & Technology*, 43, 2328-2334, 10.1021/es803389s, 2009.

Liu, C., Zhang, C., Zhang, Y., and Mu, Y.: Preliminary study on volatile organic compounds emission from domestic cooking stoves under different coal combustion modes, The 16th Annual Academic Meeting of Chinese Society for Mineralogy Petrology and Geochemistry, Changchun, China, 2015.

Liu, C., Zhang, C., Mu, Y., Liu, J., and Zhang, Y.: Emission of volatile organic compounds from domestic coal stove with the actual alternation of flaming and smoldering combustion processes, *Environmental pollution*, 221, 385-391, 10.1016/j.envpol.2016.11.089, 2017.

Liu, Y., Shao, M., Fu, L., Lu, S., Zeng, L., and Tang, D.: Source profiles of volatile organic compounds (VOCs) measured in China: Part I, *Atmospheric Environment*, 42, 6247-6260, 10.1016/j.atmosenv.2008.01.070, 2008.

Mo, Z., Shao, M., and Lu, S.: Compilation of a source profile database for hydrocarbon and OVOC emissions in China, *Atmospheric Environment*, 143, 209-217, 10.1016/j.atmosenv.2016.08.025, 2016.

Nakao, S., Clark, C. H., Tang, P., Sato, K., and Cocker, D. R.: Secondary organic aerosol formation from phenolic compounds in the absence of NO<sub>x</sub>, *Atmospheric Chemistry and Physics*, 11, 10649-10660, 2011.

Ng, N. L., Kroll, J. H., Chan, A. W. H., Chhabra, P. S., Flagan, R. C., and Seinfeld, J. H.: Secondary organic aerosol formation from m-xylene, toluene, and benzene, *Atmospheric Chemistry and Physics*, 7, 3909-3922, 2007.

Presto, A. A., Miracolo, M. A., Donahue, N. M., and Robinson, A. L.: Secondary Organic Aerosol Formation from High-NO<sub>x</sub> Photo-Oxidation of Low Volatility Precursors: n-Alkanes, *Environmental Science & Technology*, 44, 2029-2034, 10.1021/es903712r, 2010.

Stockwell, C. E., Veres, P. R., Williams, J., and Yokelson, R. J.: Characterization of biomass burning emissions from cooking fires, peat, crop residue, and other fuels with high-resolution proton-transfer-reaction time-of-flight mass spectrometry, *Atmospheric Chemistry and Physics*, 15, 845-865, 10.5194/acp-15-845-2015, 2015.

Stockwell, C. E., Christian, T. J., Goetz, J. D., Jayarathne, T., Bhave, P. V., Praveen, P. S., Adhikari, S., Maharjan, R., DeCarlo, P. F., Stone, E. A., Saikawa, E., Blake, D. R., Simpson, I. J., Yokelson, R. J., and Panday, A. K.: Nepal Ambient Monitoring and Source Testing Experiment (NAMaSTE): emissions of trace gases and light-absorbing carbon from wood and dung cooking fires, garbage and crop residue burning, brick kilns, and other sources, *Atmos. Chem. Phys.*, 16, 11043-11081, 10.5194/acp-16-11043-2016, 2016.

Tajuelo, M., Rodriguez, D., Teresa Baeza-Romero, M., Diaz-de-Mera, Y., Aranda, A., and Rodriguez, A.: Secondary organic aerosol formation from styrene photolysis and photooxidation with hydroxyl radicals, *Chemosphere*, 231, 276-286, 10.1016/j.chemosphere.2019.05.136, 2019.

Tsai, S. M., Zhang, J. J., Smith, K. R., Ma, Y., Rasmussen, R. A., and Khalil, M. A.: Characterization of non-methane hydrocarbons emitted from various cookstoves used in China, *Environ Sci Technol*, 37, 2869-2877, 10.1021/es026232a, 2003.

Wang, H., Lou, S., Huang, C., Qiao, L., Tang, X., Chen, C., Zeng, L., Wang, Q., Zhou, M., Lu, S., and Yu, X.: Source Profiles of Volatile Organic Compounds from Biomass Burning in Yangtze River Delta, China, *Aerosol and Air Quality Research*, 14, 818-828, 10.4209/aaqr.2013.05.0174, 2014.

Wang, Q., Geng, C., Lu, S., Chen, W., and Shao, M.: Emission factors of gaseous carbonaceous species from residential combustion of coal and crop residue briquettes, *Frontiers of Environmental Science & Engineering*, 7, 66-76, 10.1007/s11783-012-0428-5, 2013.

Wu, J., Kong, S., Yan, Y., Yao, L., Yan, Q., Liu, D., Shen, G., Zhang, X., and Qi, S.: Neglected biomass burning emissions of air pollutants in China-views from the corncob burning test, emission estimation, and simulations, *Atmospheric Environment*, 10.1016/j.atmosenv.2022.119082, 2022.

Yee, L. D., Kautzman, K. E., Loza, C. L., Schilling, K. A., Coggon, M. M., Chhabra, P. S., Chan, M. N., Chan, A. W. H., Hersey, S. P., Crouse, J. D., Wennberg, P. O., Flagan, R. C., and Seinfeld, J. H.: Secondary organic aerosol formation from biomass burning intermediates: phenol and methoxyphenols, *Atmospheric Chemistry and Physics*, 13, 8019-8043, 10.5194/acp-13-8019-2013, 2013.
